# Supplementary material for: N-doped carbon quantum dots for the selective detection of OCl − ions, bioimaging, and the production of Fe 3 O 4 nanoparticles utilized in the synthesis of substituted imidazole
Source: Royal Society of Chemistry journal article supplement (doi:10.1039/d4ra06474g), 2024-01-01

# **N-doped carbon quantum dots for the selective detection of OCl<sup>-</sup> ion, bioimaging, and the production of Fe<sub>3</sub>O<sub>4</sub> nanoparticles utilized in the synthesis of substituted imidazole**

Namrata Priyadarshini Hota and Sathiyarayanan Kulathu Iyer\*

Department of Chemistry, School of Advanced Sciences, Vellore Institute of Technology, Vellore-632 014, India. \*E-mail: sathiyarayananank@vit.ac.in

## **Table of Contents:**

|                                                                                                        |           |
|--------------------------------------------------------------------------------------------------------|-----------|
| 1. Quantum Yield Measurement                                                                           | S1        |
| 2. Different wavelength and PH of NCQD                                                                 | Figure S1 |
| 3. Time response of NCQD with OCl <sup>-</sup> and HRTEM image of NCQD                                 | Figure S2 |
| 4. Comparison Table of different sensors for OCl <sup>-</sup> detection                                | Table S1  |
| 5. Comparison table of catalytic activity of Fe <sub>3</sub> O <sub>4</sub> NPs imidazole (4) Reaction | Table S2  |
| 6. Comparison table of catalytic activity of Fe <sub>3</sub> O <sub>4</sub> NPs imidazole (8) Reaction | Table S3  |
| 7. Optimization Table for imidazole Reactions (4)                                                      | Table S4  |
| 7. Optimization Table for imidazole Reactions (8)                                                      | Table S5  |
| 8. Recyclability of Fe <sub>3</sub> O <sub>4</sub> NPs                                                 | S2,       |
| 9. Recyclability of Fe <sub>3</sub> O <sub>4</sub> NPs                                                 | Figure S3 |
| 10. H <sup>1</sup> and C <sup>13</sup> NMR analysis of imidazole Reactions (4)                         | S3        |
| 11. H <sup>1</sup> and C <sup>13</sup> NMR analysis of imidazole Reactions (8)                         | S4        |
| 12. H <sup>1</sup> NMR spectra and C <sup>13</sup> of the products                                     | S5        |

## S1 Quantum Yield Measurement:

Using quinine sulfate ( $\phi = 0.54$  in  $0.1\text{M H}_2\text{SO}_4$ ) as a standard reference, we determined the quantum yield of carbon dots. Using the following formula, the quantum yield was determined.

$$\Phi_{\text{CQD}} = \Phi_{\text{R}} \times \frac{I_{\text{CQD}}}{I_{\text{R}}} \times \frac{A_{\text{R}}}{A_{\text{CQD}}} \times \frac{\eta_{2\text{CQD}}}{\eta_{2\text{R}}}$$

The carbon dot and reference are denoted by CQD and R, respectively, in the equation above. " $\eta$ " indicates the refractive index of the solvent medium (ethanol has a refractive index of 1.37), " $I$ " stands for the integrated fluorescence intensity, and " $A$ " for the absorbance value at the exciting wavelength. After calculating every value, the quantum Yield was found to be **40.5%**.

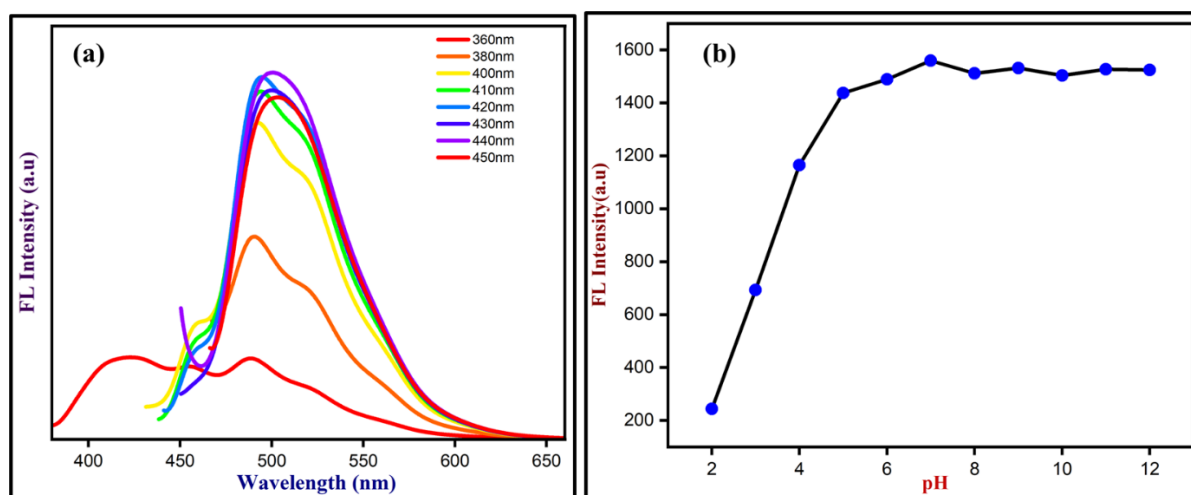

**Figure S1.** (a) represents the NCQD with different wavelengths, and (b) pH studies of the NCQD calibration plot of NCQD with varying concentrations of  $\text{OCl}^-$  ion ( $0\text{--}8\mu\text{m}$ ).

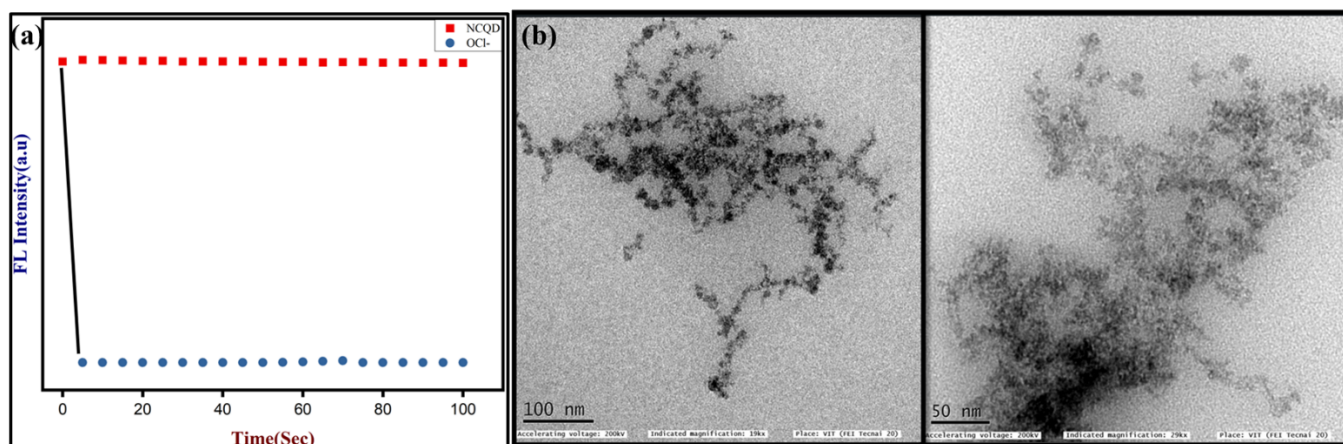

**Figure S2.** (a) Time response of NCQD with  $\text{OCl}^-$ , and (b) calibration plot of NCQD with different concentrations of  $\text{OCl}^-$  ion (0-8 $\mu\text{m}$ ).

**Table S1: Comparison Table of different sensors for  $\text{OCl}^-$  detection:**

| Sensing Probe for $\text{OCl}^-$                         | Linear range ( $\mu\text{m}$ ) | Lod ( $\mu\text{m}$ ) | Ref.                                                                                        |
|----------------------------------------------------------|--------------------------------|-----------------------|---------------------------------------------------------------------------------------------|
| CA and EDA/N-doped CQDs                                  | 1.0–10.0                       | 0.43                  | [ <i>Spectrochimica Acta Part A: Molecular and Biomolecular Spectroscopy</i> , 279, 121456] |
| $\text{MoO}_3$ NPs-G-CDs                                 | 0.010–200                      | 0.068                 | [ <i>Spectrochimica Acta Part A: Molecular and Biomolecular Spectroscopy</i> , 279, 121456] |
| Citric acid, GSH                                         | 0.1–0.8                        | 0.016                 | [ <i>Spectrochimica Acta Part A: Molecular and Biomolecular Spectroscopy</i> , 242, 118721] |
| Red Pepper-based CQD                                     | 0.1 -300                       | 0.06                  | [ <i>Analyst</i> , 138(21), 6551-6557]                                                      |
| ammonium citrate and urea                                | 10-150                         | 1.82                  | [ <i>Analytical and Bioanalytical Chemistry</i> , 414(8), 2651-2660]                        |
| <b>L- Tartaric acid and o-phenylenediamine-based CQD</b> | <b>1-8</b>                     | <b>0.04</b>           | <b>This work</b>                                                                            |

**Table S2: Comparison table of catalytic activity of  $\text{Fe}_3\text{O}_4$  NPs for imidazole (4) Reaction:**

| Entry | Catalyst                             | Solvent              | Temperature ( $^{\circ}\text{C}$ ) | Time (min) | Yield (%) | Ref.                                        |
|-------|--------------------------------------|----------------------|------------------------------------|------------|-----------|---------------------------------------------|
| 1     | $\text{Cr}_2\text{O}_3$ nanoparticle | $\text{H}_2\text{O}$ | MW, 200–500 W                      | 6          | 97        | [ <i>Scientific Reports</i> , 12(1), 19942] |

|   |                                                               |                     |                |    |    |                                                              |
|---|---------------------------------------------------------------|---------------------|----------------|----|----|--------------------------------------------------------------|
| 2 | [P4-VP]-Fe <sub>3</sub> O <sub>4</sub>                        | Solvent-free        | 100            | 35 | 91 | [ <i>Research on Chemical Intermediates</i> , 44, 6995-7011] |
| 3 | Cu <sub>2</sub> O/<br>Fe <sub>3</sub> O <sub>4</sub> @guarana | EtOH                | 70             | 20 | 97 | [ <i>Inorganic Chemistry Communications</i> , 125, 108465]   |
| 4 | Fe <sub>3</sub> O <sub>4</sub> /SiO <sub>2</sub> /urea        | EtOH                | Reflux         | 50 | 90 | [ <i>Catalysis Communications</i> , 69, 29-33]               |
| 5 | SA-MNPs                                                       | Dry petroleum ether | 100, Microwave | 35 | 88 | [ <i>Journal of Chemical Sciences</i> , 125, 835-841]        |
| 6 | Fe <sub>3</sub> O <sub>4</sub> nanoparticles                  | Solvent-free        | 100            | 90 | 94 | <b>This Work</b>                                             |

**Table S3: Comparison table of catalytic activity of Fe<sub>3</sub>O<sub>4</sub> NPs for imidazole (8) Reaction:**

| Entry | Catalyst                                         | Solvent             | Temperature (°C) | Time (min) | Yield (%) | Ref.                                            |
|-------|--------------------------------------------------|---------------------|------------------|------------|-----------|-------------------------------------------------|
| 1     | Ruthenium (II) catalyst                          | H <sub>2</sub> O    | 100              | 5          | 66        | [89(9), 6016-6026]                              |
| 2     | Iodine                                           | EtOH                | Reflux           | 60         | 80        | [ <i>Chinese Chemical Letters</i> , 20(1), 5-8] |
| 3     | TiO <sub>2</sub>                                 | Solvent-free        | 120              | 45         | 88        | [39(1), 142-154.]                               |
|       | <b>Fe<sub>3</sub>O<sub>4</sub> nanoparticles</b> | <b>Solvent-free</b> | <b>110</b>       | <b>100</b> | <b>88</b> | <b>This</b>                                     |

---

**free**

---

**Work**

---

**Table S4: Optimization table for substituted imidazole (4) Reaction:**

| Entry | Solvent          | Nitrogen Source          | Temp (°C)  | Fe <sub>3</sub> O <sub>4</sub> (mol%) | Time(min) | Yield (%) |
|-------|------------------|--------------------------|------------|---------------------------------------|-----------|-----------|
| 1     | H <sub>2</sub> O | NH <sub>4</sub> OAc      | 100        | 3.3                                   | 90        | 45        |
| 2     | DMF              | NH <sub>4</sub> OAc      | 100        | 3.3                                   | 90        | Trace     |
| 3     | Acetone          | NH <sub>4</sub> OAc      | 100        | 3.3                                   | 90        | Trace     |
| 4     | Acetonitrile     | NH <sub>4</sub> OAc      | 100        | 3.3                                   | 90        | 40        |
| 5     | Toluene          | NH <sub>4</sub> OAc      | 100        | 3.3                                   | 90        | 20        |
| 6     | EtOH             | NH <sub>4</sub> OAc      | 100        | 3.3                                   | 90        | 85        |
| 7     | EtOH             | NH <sub>4</sub> OAc      | 100        | 3.3                                   | 90        | 80        |
| 8     | THF              | NH <sub>4</sub> OAc      | 100        | 3.3                                   | 90        | 35        |
| 9     | EtOH             | NH <sub>4</sub> OAc      | 100        | 3.3                                   | 90        | 75        |
| 10    | EtOH             | NH <sub>4</sub> OAc      | 100        | -                                     | 90        | 41        |
| 11    | NEAT             | NH <sub>4</sub> OAc      | 100        | -                                     | 90        | 40        |
| 12    | NEAT             | NH <sub>4</sub> OAc      | 100        | 2                                     | 90        | 88        |
| 13    | NEAT             | NH <sub>4</sub> OAc      | 100        | 4                                     | 90        | 96        |
| 14    | NEAT             | NH <sub>4</sub> OAc      | 100        | 5                                     | 90        | 96        |
| 15    | NEAT             | <b>NH<sub>4</sub>OAc</b> | <b>100</b> | <b>3.3</b>                            | 90        | <b>96</b> |

**Table S5: Optimization table for substituted imidazole (8) Reaction:**

| Entry | Solvent                | Nitrogen Source          | Temp (°C) | Fe <sub>3</sub> O <sub>4</sub> (mol%) | Time(min) | Yield (%) |
|-------|------------------------|--------------------------|-----------|---------------------------------------|-----------|-----------|
| 1     | THF                    | NH <sub>4</sub> OAc      | 110       | 5                                     | 100       | Trace     |
| 2     | Acetone                | NH <sub>4</sub> OAc      | 110       | 5                                     | 100       | 20        |
| 3     | H <sub>2</sub> O       | NH <sub>4</sub> OAc      | 110       | 5                                     | 100       | 38        |
| 4     | EtOH: H <sub>2</sub> O | NH <sub>4</sub> OAc      | 110       | 5                                     | 100       | 70        |
| 5     | Acetonitrile           | NH <sub>4</sub> OAc      | 110       | 5                                     | 100       | 20        |
| 6     | EtOH                   | NH <sub>4</sub> OAc      | 110       | 5                                     | 100       | 78        |
| 7     | EtOH                   | NH <sub>4</sub> OAc      | 110       | 6                                     | 100       | 80        |
| 8     | Toluene                | NH <sub>4</sub> OAc      | 110       | 5                                     | 100       | 35        |
| 9     | EtOH                   | NH <sub>4</sub> OAc      | 110       | 5                                     | 100       | 75        |
| 10    | EtOH                   | NH <sub>4</sub> OAc      | 110       | -                                     | 100       | 39        |
| 11    | NEAT                   | NH <sub>4</sub> OAc      | 110       | -                                     | 100       | 53        |
| 12    | NEAT                   | NH <sub>4</sub> OAc      | 110       | 4                                     | 100       | 82        |
| 13    | NEAT                   | NH <sub>4</sub> OAc      | 110       | 6                                     | 100       | 89        |
| 14    | NEAT                   | NH <sub>4</sub> OAc      | 110       | 5.5                                   | 100       | 88        |
| 15    | NEAT                   | <b>NH<sub>4</sub>OAc</b> | 110       | <b>5</b>                              | 100       | <b>88</b> |

## S2: Recyclability of Fe<sub>3</sub>O<sub>4</sub> nanoparticles:

After the reaction was complete, the reaction mixture was allowed to cool to room temperature and moved to a centrifuge tube. After centrifuging for 10 minutes at 4000 RPM, the Fe<sub>3</sub>O<sub>4</sub> NPs that had settled to the bottom of the reaction mixture were cleaned several times with water, ethanol, and acetone. They were then ground into a fine powder and allowed to dry in an oven. After that, the reactions were conducted using the catalyst once more till 4 cycles.

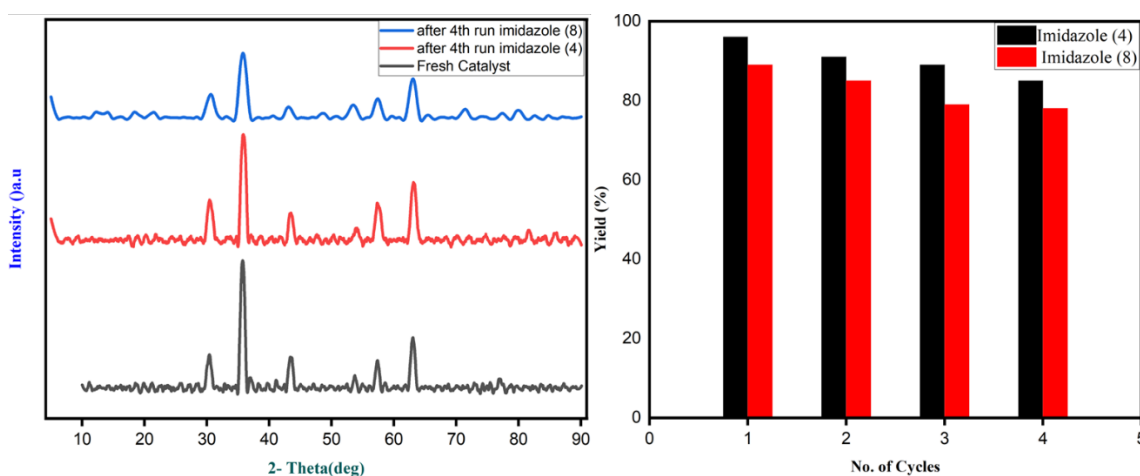

Figure S3: Recyclability study of the Fe<sub>3</sub>O<sub>4</sub> NPs

### S3: H<sup>1</sup> and C<sup>13</sup> NMR analysis result of substituted Imidazole (4) Reaction:

1. 4,5-diphenyl-2-(p-tolyl)-1H-imidazole (4a): Off -White Powder. H<sup>1</sup> NMR (400 MHz, DMSO),  $\delta$  (PPM) = 12.59 (s, 1H), 7.90 (d, J= Hz, 2H), 7.52 (m, 6H), 7.30 (t, 8 Hz, 6H), 2.36 (s, 3H). C13 NMR (100 MHz, CDCl<sub>3</sub>)  $\delta$  21.39, 125.21, 126.48, 126.56, 127.37, 127.82, 128.17, 128.59, 129.59, 138.85, 146.21.
2. 4-(4,5-diphenyl-1H-imidazol-2-yl) benzonitrile (4f): white Powder. H<sup>1</sup> NMR (400 MHz, DMSO),  $\delta$  (PPM) = 13.01 (s, 1H), 8.26 (d, J=8Hz, 2H), 7.96 (d, 8.4Hz, 2H), 7.56 (m, 4H), 7.49 (t, J=7.4Hz, 2H), 7.43(t, J= 8Hz, 1H), 7.34( t, J= 7.2Hz, 2H), 7.27 (t, J= 7.2Hz, 1H). C13 NMR (100 MHz, CDCl<sub>3</sub>)  $\delta$  117.8, 118.69, 125.41, 127.84, 128.78, 132.76, 133.78.
3. 4,5-diphenyl-2-(o-tolyl)-1H-imidazole (4b): White powder. H<sup>1</sup> NMR (400 MHz, DMSO),  $\delta$  (PPM) = 12.46 (s, 1H), 7.72 (t, J= 8.4 Hz, 1H), 7.56 (d, J= 7.2 Hz, 2H), 7.52 (d, J = 7.2 Hz, 2H), 7.45 (t, J= 7.2 Hz, 2H), 7.38 (m, 6H), 7.23 (t, J= 7.2 Hz, 1H), 2.64 (s, 3H). C13 NMR (100 MHz, CDCl<sub>3</sub>)  $\delta$  21.19, 126.06, 127.76, 128.65, 128.87, 129.74, 131.35, 136.43, 146.31.
4. 2-(4-methoxyphenyl)-4,5-diphenyl-1H-imidazole (4c): White Powder. H<sup>1</sup> NMR (400 MHz, DMSO),  $\delta$  (PPM) = 12.50 (s, 1H), 8.03 (d, J= 8.4Hz, 2H), 7.53 (d, J=8 Hz, 4H), 7.37 (s, 6H), 7.96 (d, J= 8.8 Hz, 2H), 3.82 (s, 3H). C13 NMR (100 MHz, CDCl<sub>3</sub>)  $\delta$  55.39, 114.32, 122.73, 126.75, 127.37, 127.78, 128.61, 146.07, 160.21.
5. 2-(2-methoxyphenyl)-4,5-diphenyl-1H-imidazole(4d): white Powder. H<sup>1</sup> NMR (400 MHz, DMSO),  $\delta$  (PPM) = 11.89 (s, 1H), 8.05 (m, 1H), 7.53 (m, 8H), 7.31 (t, J= 7.2 Hz, 2H), 7.23 (d, J= 8Hz, 1H), 7.18 (d, J= 8Hz, 1H), 7.09 (t, J= 7.2 Hz, 1H), 3.92 (s, 3H). C13 NMR (100 MHz, CDCl<sub>3</sub>)  $\delta$  55.91, 111.21, 118.18, 121.71, 127.81, 128.66, 129.53, 144.65, 155.74.
6. 2-(4-nitrophenyl)-4,5-diphenyl-1H-imidazole (4e): Yellow Powder. H<sup>1</sup> NMR (400 MHz, DMSO),  $\delta$  (PPM) = 13.16 (s, 1H), 8.37 (m, 4H), 7.57 (m, 4H), 7.49 (t, J= 8 Hz, 2H), 7.43 (d, J= 6.8 Hz, 1H), 7.35 (t, J= 7.2 Hz, 2H), 7.28 (t, J= 8Hz, 1H). C13 NMR (100 MHz, CDCl<sub>3</sub>)  $\delta$  124.41, 125.51, 127.88, 128.01, 128.77, 135.52, 143.47, 147.41.
7. 4-(4,5-diphenyl-1H-imidazol-2-yl) benzonitrile (4f), white powder. H<sup>1</sup> NMR (400 MHz, DMSO),  $\delta$  (PPM) = 13.01 (s, 1H), 8.26 (d, j= 8 Hz, 2H), 7.96 (d, J= 8.4 Hz, 2H), 7.56 (m, 4H), 7.49 (t, J= 7.2 Hz), 7.43 (d, J= 7.2 Hz, 1H), 7.34 (t, J= 8Hz, 2H), 7.27 (t, J= 7.2 Hz, 1H). C13 NMR (100 MHz, CDCl<sub>3</sub>)  $\delta$
8. 1-(4,5-diphenyl-1H-imidazol-2-yl) naphthalen-2-ol (4g): Yellow Powder. H<sup>1</sup> NMR (400 MHz, DMSO),  $\delta$  (PPM)= 12.5-11.5 (2H), 8.19 (d, J= 8Hz, 1H), 7.91 (t, J= 8.8Hz, 2H), 7.57 (d, J=

7.2Hz, 4H), 7.51 (t,  $J=7.6$  Hz, 1H), 7.41 (m, 5H), 7.34 (m, 3H). C13 NMR (100 MHz,  $\text{CDCl}_3$ )  $\delta$  115.87, 116.09, 126.24, 127.21, 127.55, 127.80, 128.65, 145.18, 161.89.

9. 2-(4-fluorophenyl)-4,5-diphenyl-1H-imidazole (4h), Brown solid.  $\text{H}^1$  NMR (400 MHz, DMSO),  $\delta$  (PPM) = 12.69 (s, 1H), 8.14 (m, 2H), 7.55 (d,  $J=7.2$  Hz, 2H), 7.51 (t,  $J=8$ Hz, 2H), 7.47 (t,  $J=7.2$ Hz, 2H), 7.40 (d,  $J=7.2$ Hz, 1H), 7.35 (m, 4H), 7.24 (t,  $J=7.6$ Hz, 1H). 2-(5-methylfuran-2-yl)-4,5-diphenyl-1H-imidazole (4i): brown powder.  $\text{H}^1$  NMR (400 MHz, DMSO),  $\delta$  (PPM) = 12.68 (s, 1H), 7.52 (t,  $J=7.8$  Hz, 2H), 7.48 (d,  $J=6.8$ Hz, 2H), 7.44 (t,  $J=7.2$  Hz, 2H), 7.37 (t,  $J=4.8$  Hz, 1H), 7.31 (t,  $J=7.2$ Hz, 2H), 7.23 (t,  $J=7.2$ Hz, 1H), 6.86 (d,  $J=4$ Hz, 1H), 6.25 (t,  $J=4$ Hz, 1H), 2.38 (s, 3H).

10. 2-(4,5-diphenyl-1H-imidazol-2-yl)-6-methoxy phenol (4j): white powder.  $\text{H}^1$  NMR (400 MHz, DMSO),  $\delta$  (PPM) = 13.05 (s, 1H), 13.01 (s, 1H), 7.65 (t,  $J=4$  Hz, 1 H), 7.54 (m, 5H), 7.47 (t,  $J=6.8$  Hz, 2H), 7.37 (t,  $J=7.6$  Hz, 2H), 7.29 (t,  $J=7.2$  Hz, 1H), 7.00 (d,  $J=8$ Hz, 1H), 6.90 (t,  $J=8$ Hz, 1H), 3.82 (s, 3H). C13 NMR (100 MHz,  $\text{CDCl}_3$ )  $\delta$  56.15, 112.07, 112.95, 115.59, 118.84, 127.72, 128.74, 145.54, 147.02, 148.89.

11. 2-(3-phenoxyphenyl)-4,5-diphenyl-1H-imidazole (4k): white powder.  $\text{H}^1$  NMR (400 MHz, DMSO),  $\delta$  (PPM) = 12.74 (s, 1H), 7.90 (d,  $J=8$ Hz 1H), 7.78 (t,  $J=4$ Hz, 1H), 7.75 (m, 4H), 7.45 (m, 5H), 7.31 (t,  $J=7.2$  Hz, 2H), 7.24 (t,  $J=7.2$  Hz, 1H), 7.18 (t,  $J=7.6$  Hz, 1H), 7.08 (d,  $J=7.6$  Hz, 2H), 7.04 (m, 1H), C13 NMR (100 MHz,  $\text{CDCl}_3$ )  $\delta$  115.64, 118.96, 119.32, 120.24, 123.48, 127.82, 128.74, 129.87, 130.38, 131.38, 131.69, 157.08, 157.80.

#### **S4: $\text{H}^1$ NMR analysis result of imidazole (8):**

1. 2-(3-methoxyphenyl)-1H-phenanthro[9,10-d] imidazole (8a): yellow solid.  $\text{H}^1$  NMR (400 MHz, DMSO),  $\delta$  (PPM) = 13.42 (s, 1H), 8.89 (m, 2H), 8.61 (m, 2H), 7.92 (t,  $J=8$ Hz, 2H), 7.78 (m, 2H), 7.67 (m, 2H), 7.54 (t,  $J=8$ Hz, 1H), 7.09 (m, 1H), 3.93 (s, 3H). C13 NMR (100 MHz,  $\text{CDCl}_3$ )  $\delta$

2. 2-(4-ethoxy phenyl)-1H-phenanthro[9,10-d] imidazole (8b): light brown powder.  $\text{H}^1$  NMR (400 MHz, DMSO),  $\delta$  (PPM) = 13.29 (s, 1H), 8.86 (d,  $J=8$ Hz, 2H), 8.56 (s, 2H), 8.25 (d,  $J=8.8$ Hz, 2H), 7.75 (t,  $J=6.8$ Hz, 2H), 7.64 (m, 2H), 7.16 (d,  $J=8.8$ Hz, 2H), 4.16 (m, 2H), 1.40 (t,  $J=6.8$ Hz, 3H). C13 NMR (100 MHz,  $\text{CDCl}_3$ )  $\delta$

3. 2-(3-fluorophenyl)-1H-phenanthro[9,10-d] imidazole (8c): yellow solid.  $\text{H}^1$  NMR (400 MHz, DMSO),  $\delta$  (PPM) = 13.54 (s, 1H), 8.89 (m, 2H), 8.61 (d,  $J=7.8$ Hz, 1H), 8.55 (d,  $J=8$ Hz, 1H), 8.19 (d,  $J=8$ Hz, 1H), 8.12 (t,  $J=8.4$ Hz, 1H), 7.79 (m, 2H), 7.68 (m, 3H), 7.36 (m, 3H). C13 NMR (100 MHz,  $\text{CDCl}_3$ )  $\delta$



4. 2-(2-ethoxy phenyl)-1H-phenanthro[9,10-d] imidazole (8d):  $^1\text{H}$  NMR (400 MHz,  $\text{CDCl}_3$ ),  $\delta$  (PPM) = 11.40 (s, 1H), 8.80 (m, 4H), 7.87 (d,  $J=8\text{ Hz}$ , 1H), 7.73 (t,  $J=6.8\text{ Hz}$ , 1H), 7.63 (t,  $J=7.2$ , 3H), 7.38 (m, 1H), 7.19 (t,  $J=7.6\text{ Hz}$ , 1H), 7.04 (d,  $J=8\text{ Hz}$ , 1H), 4.35 (m, 2H), 1.76 (t,  $J=7.2\text{ Hz}$ , 3H).
5. 2-(4-chlorophenyl)-1H-phenanthro[9,10-d] imidazole (8e): white solid.  $^1\text{H}$  NMR (400 MHz, DMSO),  $\delta$  (PPM) = 13.54 (s, 1H), 8.86 (s, 2H), 8.56 (s, 2H), 8.34 (d,  $J=8.8\text{ Hz}$ ), 7.75 (m, 6H).  $^{13}\text{C}$  NMR (100 MHz,  $\text{CDCl}_3$ )  $\delta$
6. 2-(naphthalen-1-yl)-1H-phenanthro[9,10-d] imidazole (8f): Yellow Powder.  $^1\text{H}$  NMR (400 MHz, DMSO),  $\delta$  (PPM) = 13.66 (s, 1H), 9.20 (d,  $J=8.4\text{ Hz}$ , 1H), 8.90 (d,  $J=6.8\text{ Hz}$ , 2H), 8.65 (s, 1H), 8.59 (s, 1H), 8.15 (t,  $J=7.6\text{ Hz}$ , 2H), 8.09 (d,  $J=8\text{ Hz}$ , 1H), 7.78 (m, 3H), 7.70 (m, 4H).  $^{13}\text{C}$  NMR (100 MHz,  $\text{CDCl}_3$ )  $\delta$

**S5:  $^1\text{H}$  NMR spectra (400 MHz) of the products:**

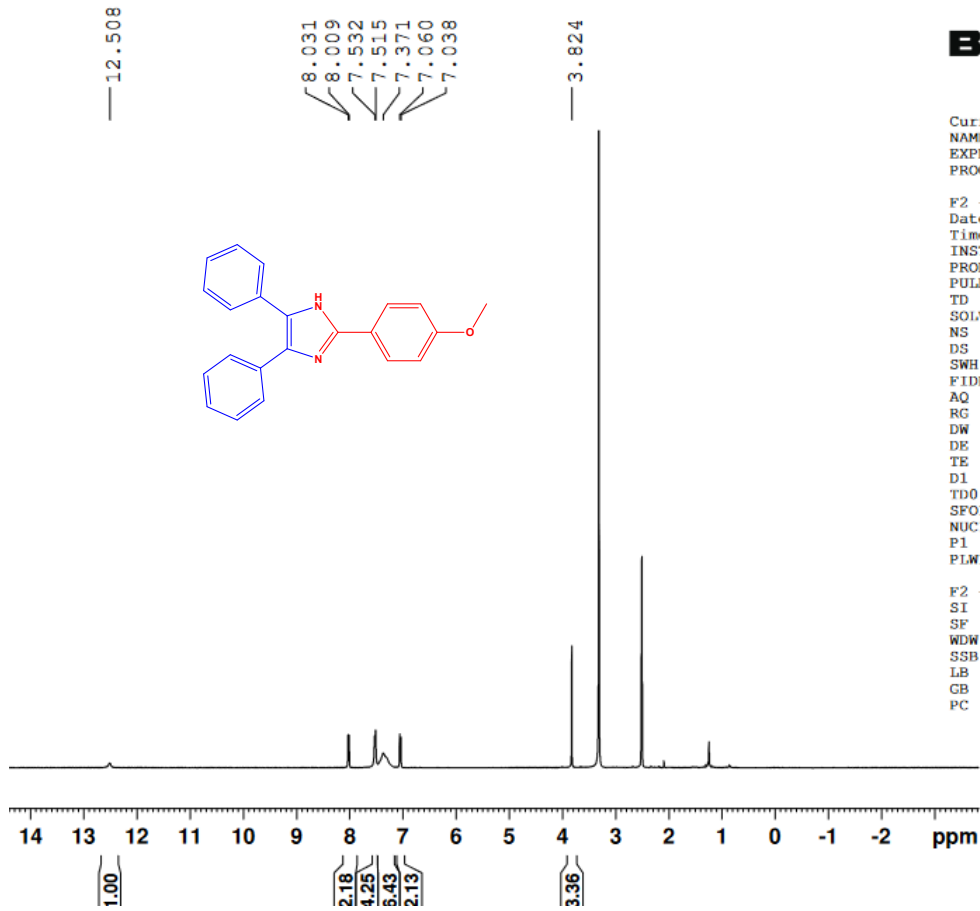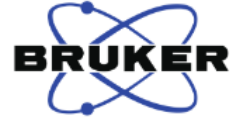

Current Data Parameters  
 NAME Dr.SYN060524  
 EXPNO 4  
 PROCNO 1

F2 - Acquisition Parameters  
 Date\_ 20240506  
 Time 14.30 h  
 INSTRUM spect  
 PROBHD z108618\_0505 (zg30)  
 PULPROG 65536  
 TD 2  
 SOLVENT DMSO  
 NS 32  
 DS 2  
 SWH 8012.820 Hz  
 FIDRES 0.244532 Hz  
 AQ 4.0894465 sec  
 RG 199.6  
 DW 62.400 usec  
 DE 6.50 usec  
 TE 307.5 K  
 D1 1.00000000 sec  
 TDO 1  
 SFO1 400.2604716 MHz  
 NUC1 1H  
 P1 15.00 usec  
 PLW1 15.21399975 W

F2 - Processing parameters  
 SI 65536  
 SF 400.2580000 MHz  
 WDW EM  
 SSB 0  
 LB 0.30 Hz  
 CB 0  
 PC 1.00

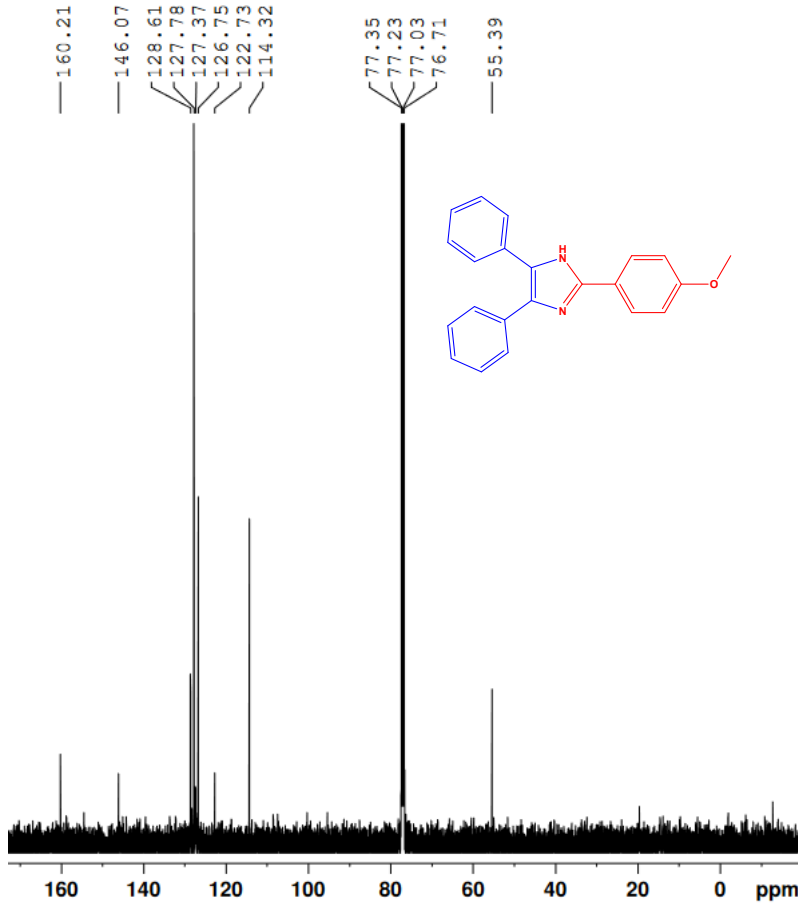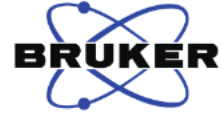

Current Data Parameters  
 NAME Dr.SYN280924  
 EXPNO 37  
 PROCNO 1

F2 - Acquisition Parameters  
 Date\_ 20240929  
 Time 6.06 h  
 INSTRUM spect  
 PROBHD z108618\_0505 (  
 PULPROG zgpg30  
 TD 65536  
 SOLVENT CDC13  
 NS 512  
 DS 4  
 SWH 24038.461 Hz  
 FIDRES 0.733596 Hz  
 AQ 1.3631488 sec  
 RG 175.97  
 DW 20.800 usec  
 DE 6.50 usec  
 TE 302.6 K  
 D1 2.0000000 sec  
 D11 0.0300000 sec  
 TDO 1  
 SFO1 100.6550186 MHz  
 NUC1 13C  
 P1 10.00 usec  
 PLW1 56.49300003 W  
 SFO2 400.2596010 MHz  
 NUC2 1H  
 CPDPRG2 waltz16  
 PCPD2 90.00 usec  
 PLW2 15.21399975 W  
 PLW12 0.42261001 W  
 PLW13 0.21257000 W

F2 - Processing parameters  
 SI 32768  
 SF 100.6449542 MHz  
 WDW EM  
 SSB 0  
 LB 1.00 Hz  
 GB 0  
 PC 1.40

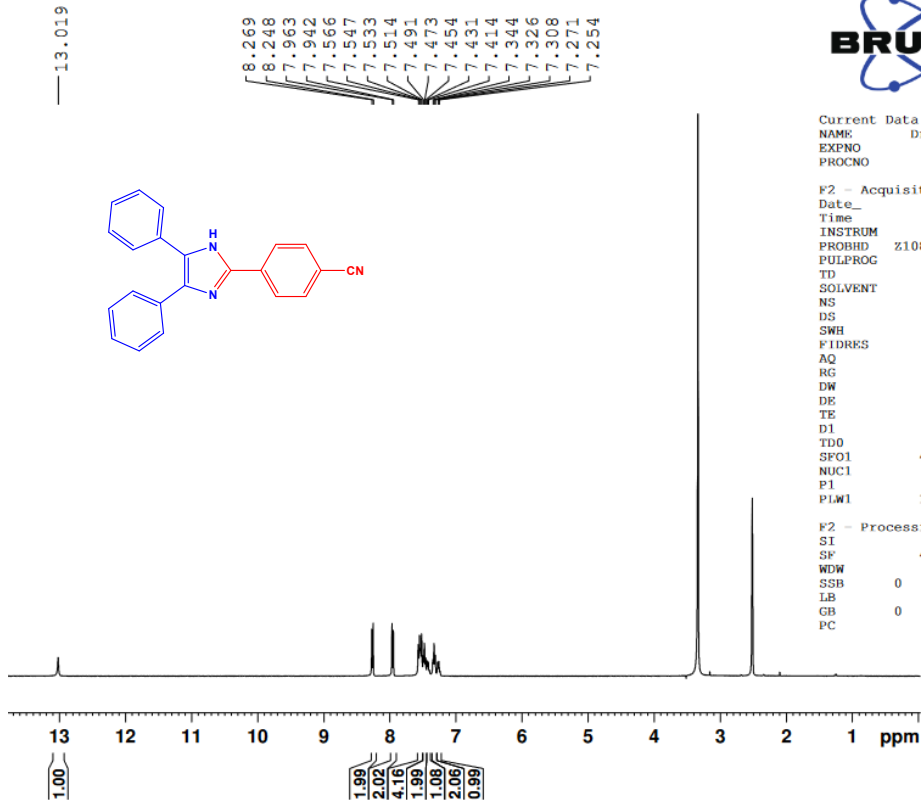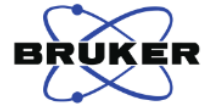

Current Data Parameters  
 NAME Dr.SYN090524  
 EXPNO 12  
 PROCNO 1

F2 - Acquisition Parameters  
 Date\_ 20240509  
 Time 14.58 h  
 INSTRUM spect  
 PROBHD z108618\_0505 (  
 PULPROG zg30  
 TD 65536  
 SOLVENT DMSO  
 NS 32  
 DS 2  
 SWH 8012.820 Hz  
 FIDRES 0.244532 Hz  
 AQ 4.0894465 sec  
 RG 175.97  
 DW 62.400 usec  
 DE 6.50 usec  
 TE 305.4 K  
 D1 1.0000000 sec  
 TDO 1  
 SFO1 400.2604716 MHz  
 NUC1 1H  
 P1 15.00 usec  
 PLW1 15.21399975 W

F2 - Processing parameters  
 SI 65536  
 SF 400.2580000 MHz  
 WDW EM  
 SSB 0  
 LB 0.30 Hz  
 GB 0  
 PC 1.00

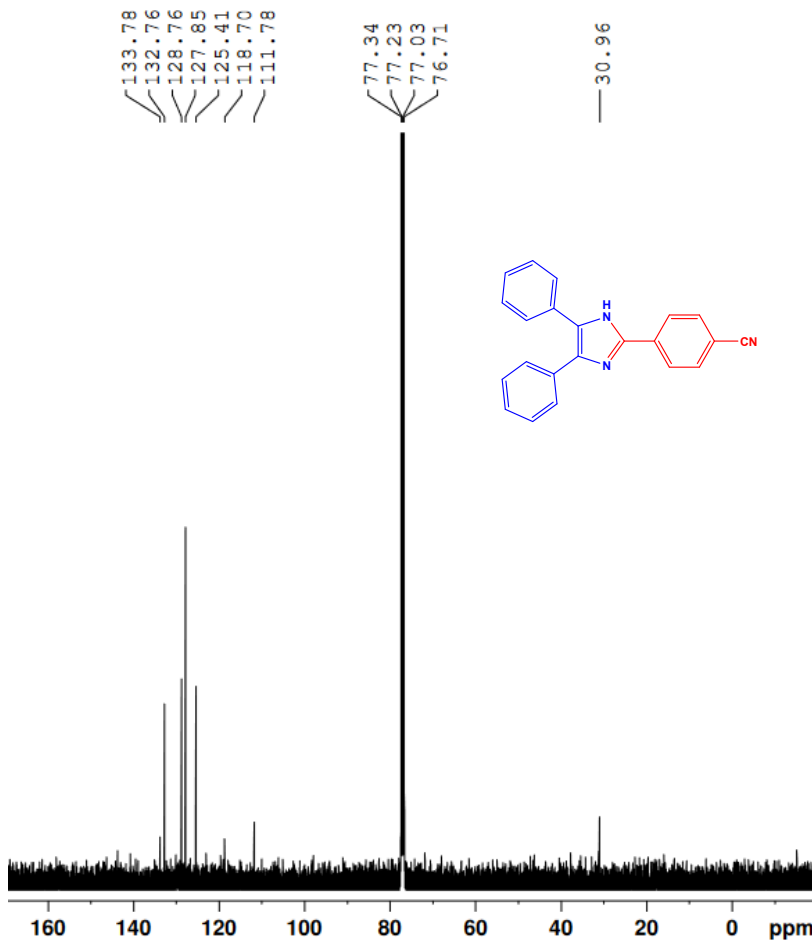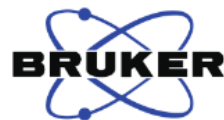

Current Data Parameters  
 NAME Dr.SYN161024  
 EXPNO 24  
 PROCNO 1

F2 - Acquisition Parameters  
 Date\_ 20241016  
 Time 2.08 h  
 INSTRUM spect  
 PROBHD Z108618\_0505 (  
 PULPROG zgpg30  
 TD 65536  
 SOLVENT CDC13  
 NS 512  
 DS 4  
 SWH 24038.461 Hz  
 FIDRES 0.733596 Hz  
 AQ 1.3631488 sec  
 RG 143.73  
 DW 20.800 usec  
 DE 6.50 usec  
 TE 302.8 K  
 D1 2.00000000 sec  
 D11 0.03000000 sec  
 TD0 1  
 SFO1 100.6550186 MHz  
 NUC1 13C  
 P1 10.00 usec  
 PLW1 56.49300003 W  
 SFO2 400.2596010 MHz  
 NUC2 1H  
 CPDPRG[2] waltz16  
 PCPD2 90.00 usec  
 PLW2 15.21399975 W  
 PLW12 0.42261001 W  
 PLW13 0.21257000 W

F2 - Processing parameters  
 SI 32768  
 SF 100.6449542 MHz  
 WDW EM  
 SSB 0  
 LB 1.00 Hz  
 GB 0  
 PC 1.40

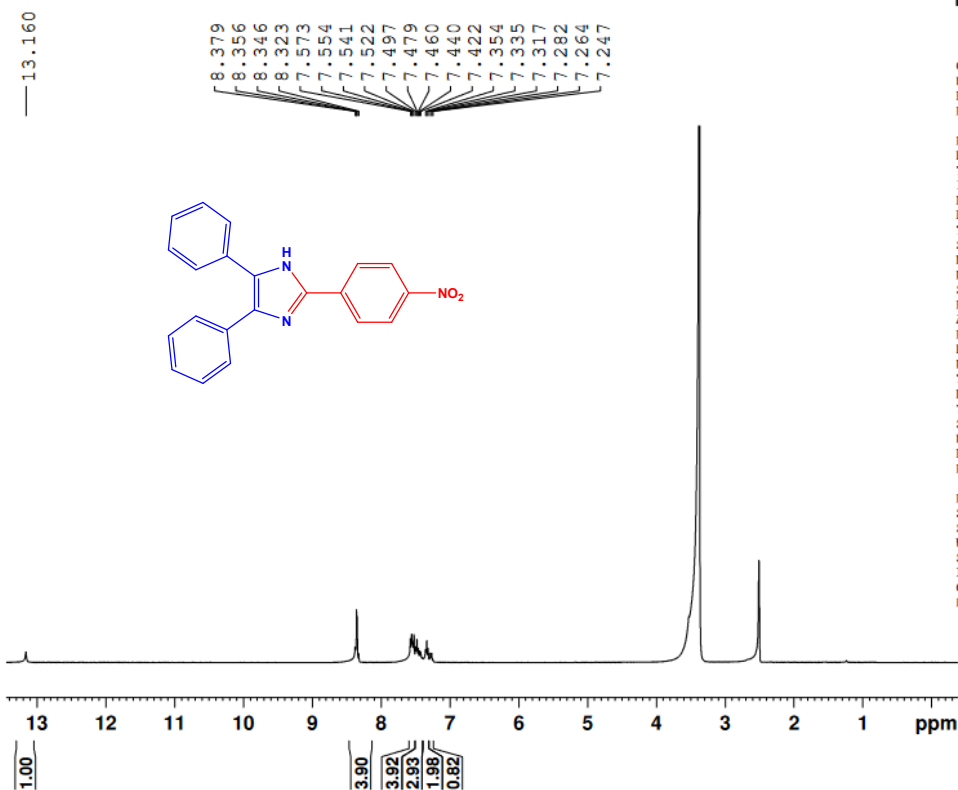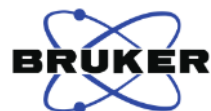

Current Data Parameters  
 NAME Dr.SYN210524  
 EXPNO 31  
 PROCNO 1

F2 - Acquisition Parameters  
 Date\_ 20240521  
 Time 15.08 h  
 INSTRUM spect  
 PROBHD Z108618\_0505 (  
 PULPROG zg30  
 TD 65536  
 SOLVENT DMSO  
 NS 32  
 DS 2  
 SWH 8012.820 Hz  
 FIDRES 0.244532 Hz  
 AQ 4.0894465 sec  
 RG 127.79  
 DW 62.400 usec  
 DE 6.50 usec  
 TE 303.4 K  
 D1 1.00000000 sec  
 TD0 1  
 SFO1 400.2604716 MHz  
 NUC1 1H  
 P1 15.00 usec  
 PLW1 15.21399975 W

F2 - Processing parameters  
 SI 65536  
 SF 400.2580000 MHz  
 WDW EM  
 SSB 0  
 LB 0.30 Hz  
 GB 0  
 PC 1.00

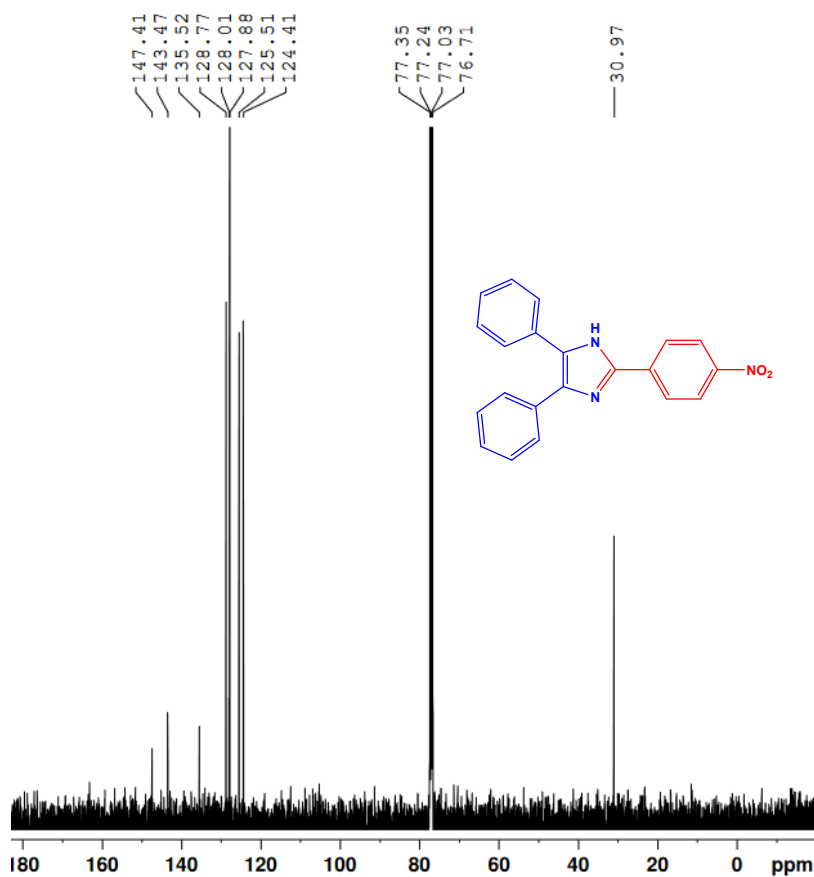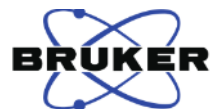

Current Data Parameters  
 NAME Dr.SYN230924  
 EXPNO 20  
 PROCNO 1

F2 - Acquisition Parameters  
 Date\_ 20240924  
 Time 1.53 h  
 INSTRUM spect  
 PROBHD Z108618\_0505 ( )  
 PULPROG zgpg30  
 TD 65536  
 SOLVENT CDC13  
 NS 512  
 DS 4  
 SWH 24038.461 Hz  
 FIDRES 0.733596 Hz  
 AQ 1.3631488 sec  
 RG 88.69  
 DW 20.800 usec  
 DE 6.50 usec  
 TE 302.4 K  
 D1 2.00000000 sec  
 D11 0.03000000 sec  
 TDO 1  
 SFO1 100.6550186 MHz  
 NUC1 13C  
 P1 10.00 usec  
 PLW1 56.49300003 W  
 SFO2 400.2596010 MHz  
 NUC2 1H  
 CPDPRG2 waltz16  
 PCPD2 90.00 usec  
 PLW2 15.21399975 W  
 PLW12 0.42261001 W  
 PLW13 0.21257000 W

F2 - Processing parameters  
 SI 32768  
 SF 100.6449542 MHz  
 WDW EM  
 SSB 0  
 LB 1.00 Hz  
 GB 0  
 PC 1.40

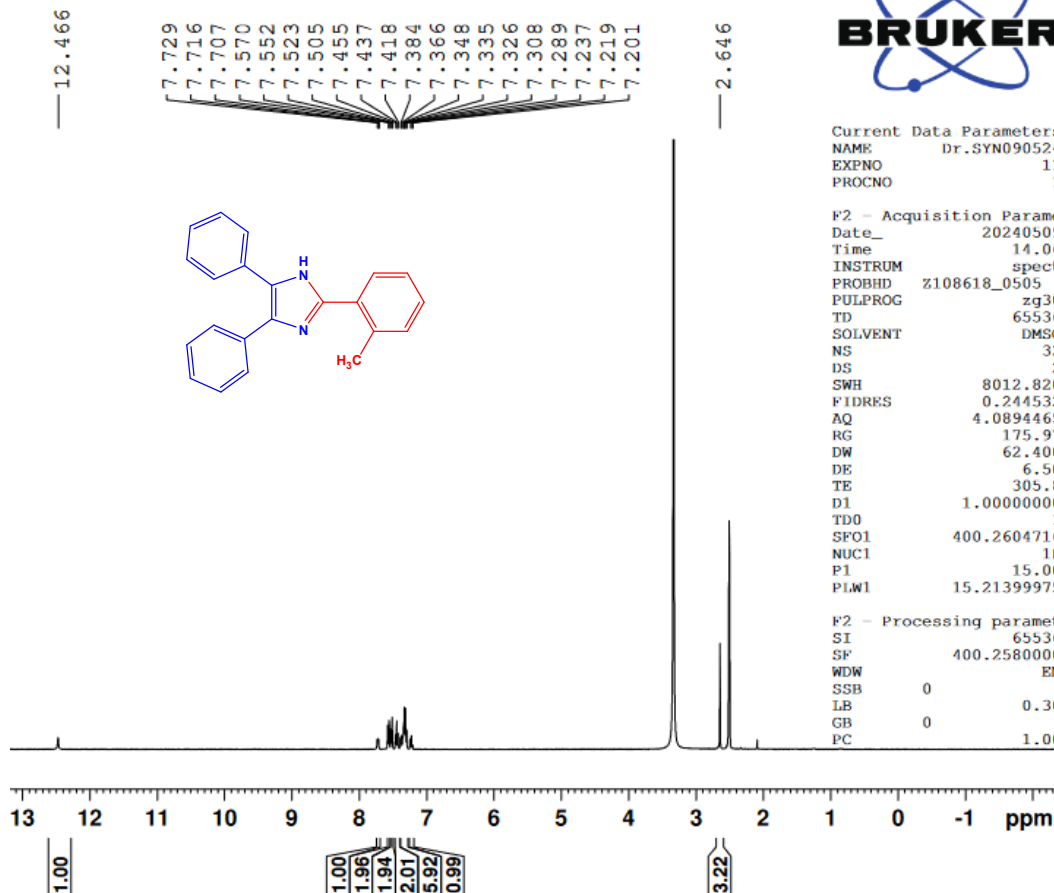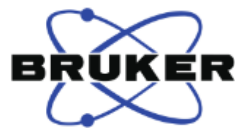

Current Data Parameters  
 NAME Dr.SYN090524  
 EXPNO 11  
 PROCNO 1

F2 - Acquisition Parameters  
 Date\_ 20240509  
 Time 14.06 h  
 INSTRUM spect  
 PROBHD Z108618\_0505 ( )  
 PULPROG zg30  
 TD 65536  
 SOLVENT DMSO  
 NS 32  
 DS 2  
 SWH 8012.820 Hz  
 FIDRES 0.244532 Hz  
 AQ 4.0894465 sec  
 RG 175.97  
 DW 62.400 usec  
 DE 6.50 usec  
 TE 305.8 K  
 D1 1.00000000 sec  
 TDO 1  
 SFO1 400.2604716 MHz  
 NUC1 1H  
 P1 15.00 usec  
 PLW1 15.21399975 W

F2 - Processing parameters  
 SI 65536  
 SF 400.2580000 MHz  
 WDW EM  
 SSB 0  
 LB 0.30 Hz  
 GB 0  
 PC 1.00

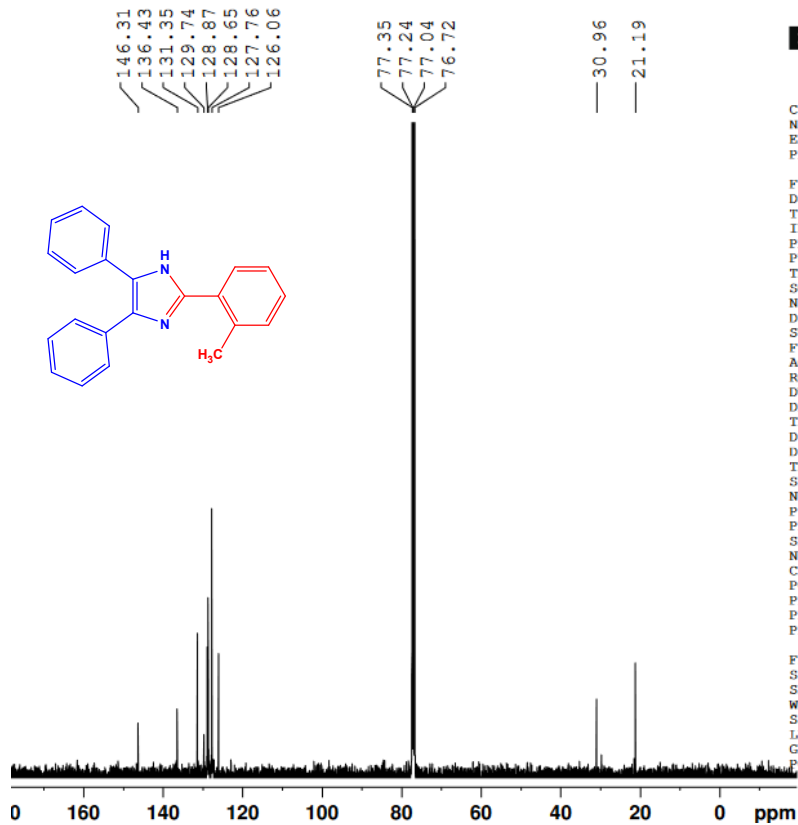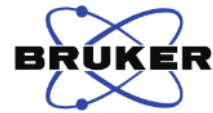

Current Data Parameters  
 NAME: Dr.SYN230924  
 EXPNO: 21  
 PROCNO: 1

F2 - Acquisition Parameters  
 Date\_: 20240924  
 Time: 2.25 h  
 INSTRUM: spect  
 PROBHD: Z108618\_0505 ( )  
 PULPROG: zgpg30  
 TD: 65536  
 SOLVENT: CDCl3  
 NS: 512  
 DS: 4  
 SWH: 24038.461 Hz  
 FIDRES: 0.733596 Hz  
 AQ: 1.3631488 sec  
 RG: 175.97  
 DW: 20.800 usec  
 DE: 6.50 usec  
 TE: 302.4 K  
 D1: 2.00000000 sec  
 D11: 0.03000000 sec  
 TDO: 1  
 SFO1: 100.6550186 MHz  
 NUC1: 13C  
 P1: 10.00 usec  
 PLW1: 56.49300003 W  
 SFO2: 400.2596010 MHz  
 NUC2: 1H  
 CPDPRG[2]: waltz16  
 PCPD2: 90.00 usec  
 PLW2: 15.21399975 W  
 PLW12: 0.42261001 W  
 PLW13: 0.21257000 W

F2 - Processing parameters  
 SI: 32768  
 SF: 100.6449542 MHz  
 WDW: EM  
 SSB: 0  
 LB: 1.00 Hz  
 GB: 0  
 PC: 1.40

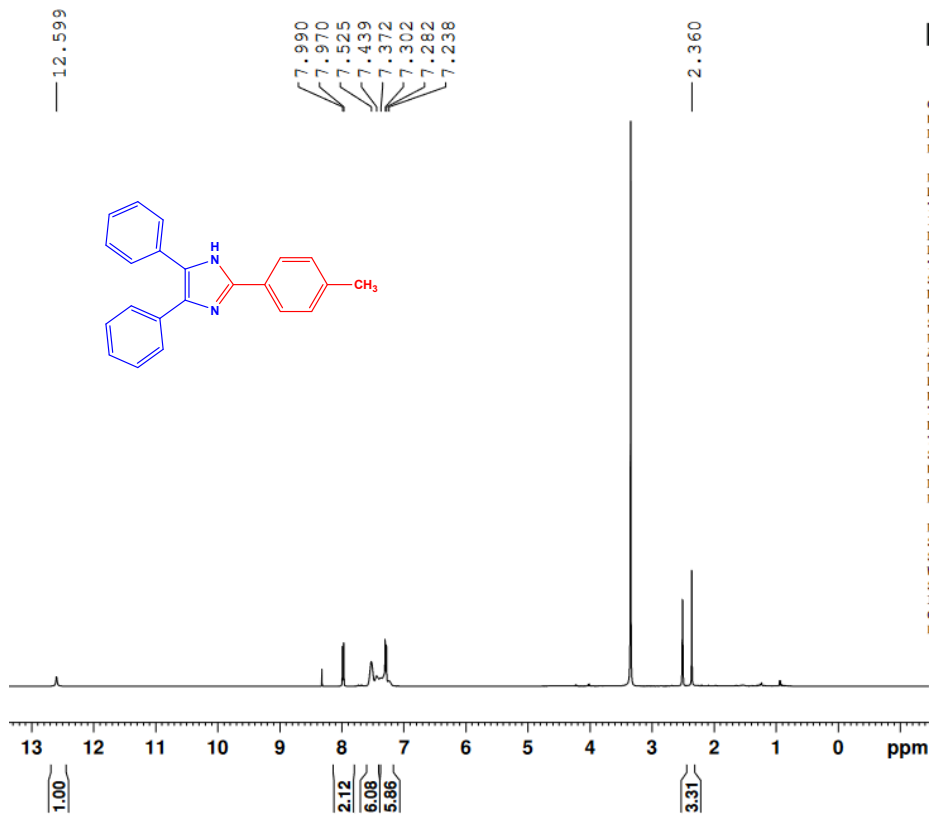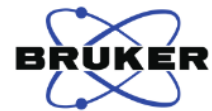

Current Data Parameters  
 NAME: Dr.SYN140524  
 EXPNO: 19  
 PROCNO: 1

F2 - Acquisition Parameters  
 Date\_: 20240514  
 Time: 13.16 h  
 INSTRUM: spect  
 PROBHD: Z108618\_0505 ( )  
 PULPROG: zg30  
 TD: 65536  
 SOLVENT: DMSO  
 NS: 64  
 DS: 2  
 SWH: 8012.820 Hz  
 FIDRES: 0.244532 Hz  
 AQ: 4.0894465 sec  
 RG: 143.73  
 DW: 62.400 usec  
 DE: 6.50 usec  
 TE: 303.7 K  
 D1: 1.00000000 sec  
 TDO: 1  
 SFO1: 400.2604716 MHz  
 NUC1: 1H  
 P1: 15.00 usec  
 PLW1: 15.21399975 W

F2 - Processing parameters  
 SI: 65536  
 SF: 400.2580000 MHz  
 WDW: EM  
 SSB: 0  
 LB: 0.30 Hz  
 GB: 0  
 PC: 1.00

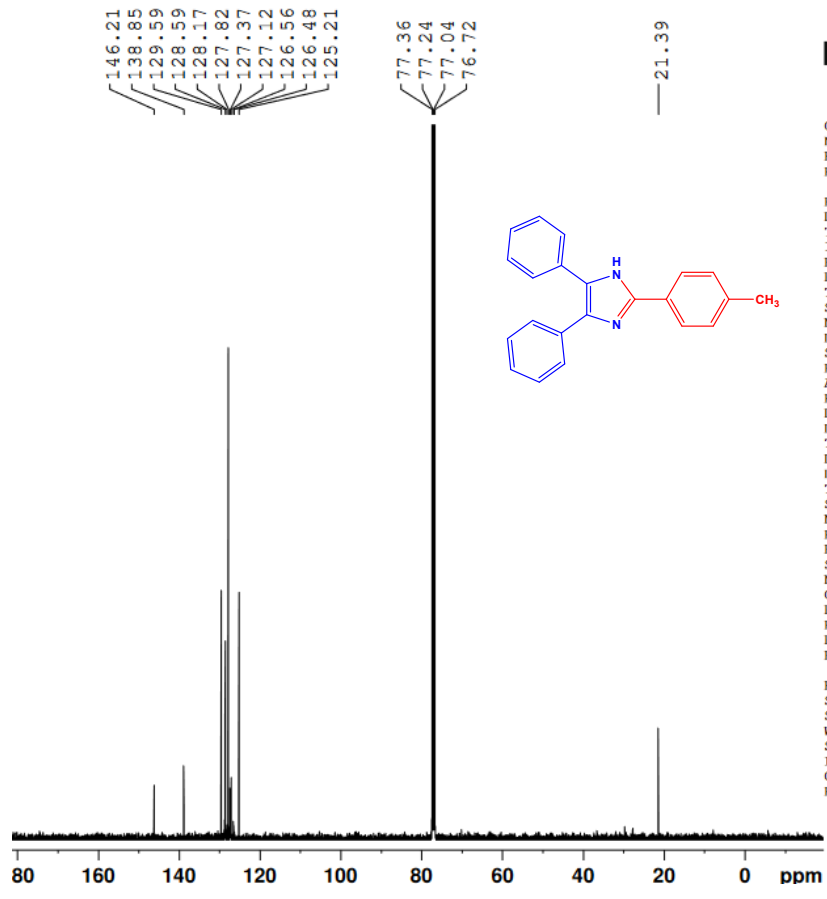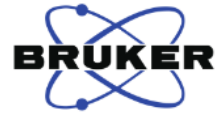

Current Data Parameters  
 NAME: Dr.SYN280924  
 EXPNO: 36  
 PROCNO: 1

F2 - Acquisition Parameters  
 Date\_: 20240929  
 Time: 5.33 h  
 INSTRUM: spect  
 PROBHD: Z108618\_0505 (  
 PULPROG: zgpg30  
 TD: 65536  
 SOLVENT: CDCl3  
 NS: 512  
 DS: 4  
 SWH: 24038.461 Hz  
 FIDRES: 0.733596 Hz  
 AQ: 1.3631488 sec  
 RG: 175.97  
 DW: 20.800 usec  
 DE: 6.50 usec  
 TE: 302.8 K  
 D1: 2.0000000 sec  
 D11: 0.0300000 sec  
 TD0: 1  
 SFO1: 100.6550186 MHz  
 NUC1: 13C  
 P1: 10.00 usec  
 PLW1: 56.4930003 W  
 SFO2: 400.2596010 MHz  
 NUC2: 1H  
 CPDPRG[2]: waltz16  
 PCPD2: 90.00 usec  
 PLW2: 15.21399975 W  
 PLW12: 0.42261001 W  
 PLW13: 0.21257000 W

F2 - Processing parameters  
 SI: 32768  
 SF: 100.6449542 MHz  
 WDW: EM  
 SSB: 0  
 LB: 1.00 Hz  
 GB: 0  
 PC: 1.40

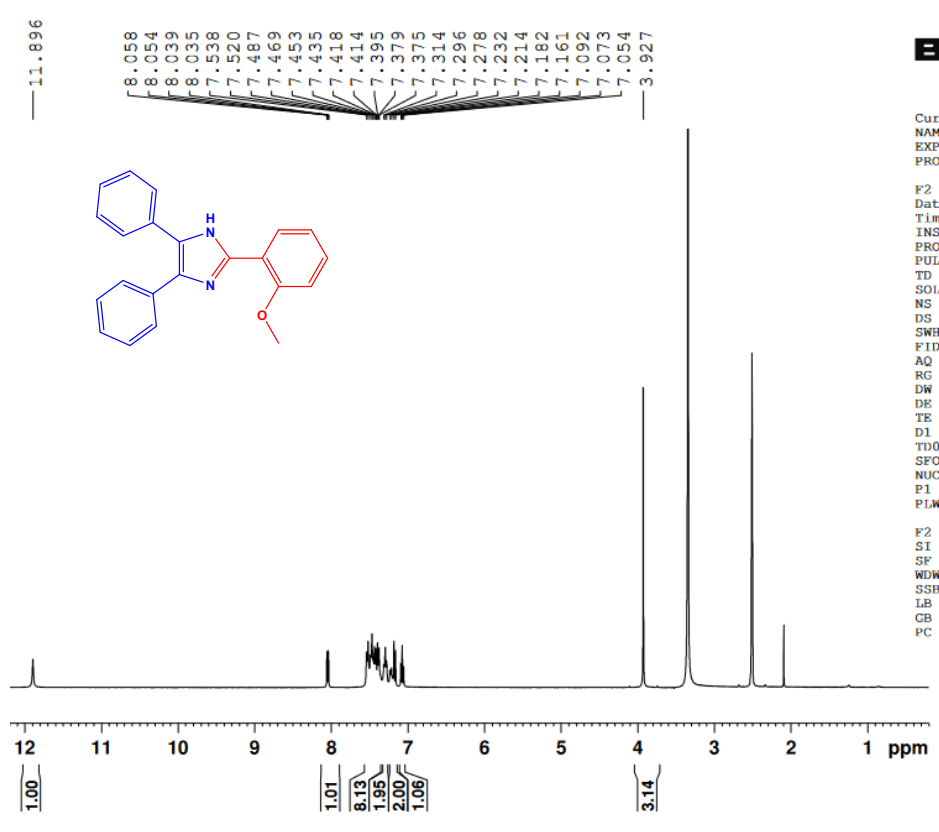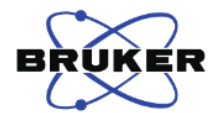

Current Data Parameters  
 NAME: Dr.SYN140524  
 EXPNO: 20  
 PROCNO: 1

F2 - Acquisition Parameters  
 Date\_: 20240514  
 Time: 13.23 h  
 INSTRUM: spect  
 PROBHD: Z108618\_0505 (  
 PULPROG: zg30  
 TD: 65536  
 SOLVENT: DMSO  
 NS: 64  
 DS: 2  
 SWH: 8012.820 Hz  
 FIDRES: 0.244532 Hz  
 AQ: 4.0894465 sec  
 RG: 156.91  
 DW: 62.400 usec  
 DE: 6.50 usec  
 TE: 303.7 K  
 D1: 1.0000000 sec  
 TD0: 1  
 SFO1: 400.2604716 MHz  
 NUC1: 1H  
 P1: 15.00 usec  
 PLW1: 15.21399975 W

F2 - Processing parameters  
 SI: 65536  
 SF: 400.2580000 MHz  
 WDW: EM  
 SSB: 0  
 LB: 0.30 Hz  
 GB: 0  
 PC: 1.00

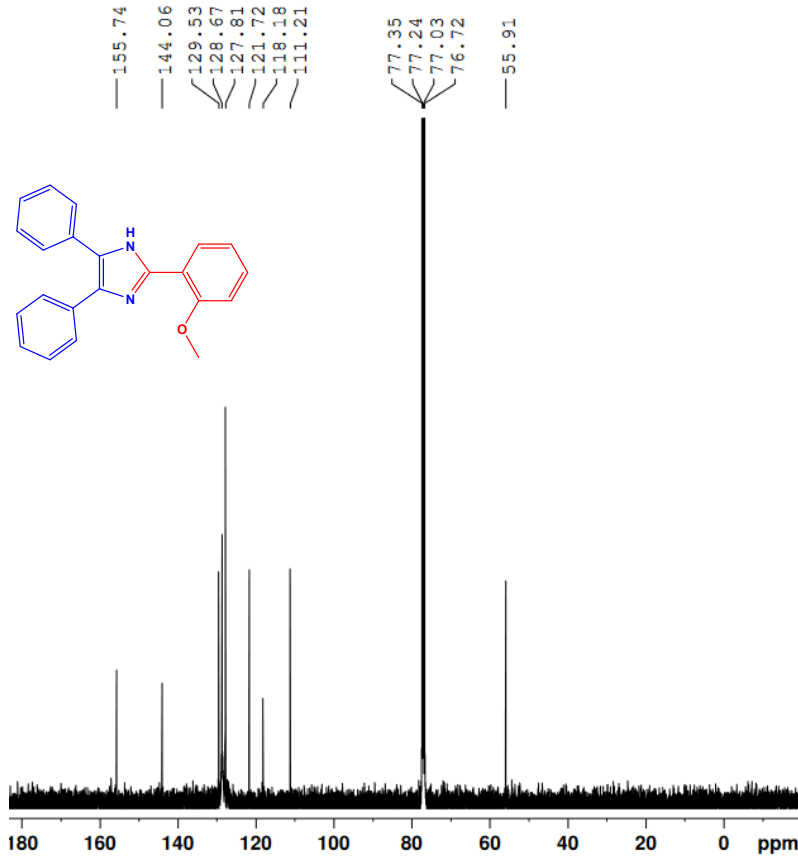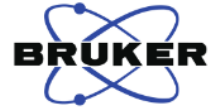

Current Data Parameters  
 NAME Dr.SYNI21024  
 EXPNO 13  
 PROCNO 1

F2 - Acquisition Parameters  
 Date\_ 20241013  
 Time 11.38 h  
 INSTRUM spect  
 PROBHD Z108618\_0505 (  
 PULPROG zgpg30  
 TD 65536  
 SOLVENT CDCl3  
 NS 512  
 DS 4  
 SWH 24038.461 Hz  
 FIDRES 0.733596 Hz  
 AQ 1.3631488 sec  
 RG 199.6  
 DW 20.800 usec  
 DE 6.50 usec  
 TE 304.2 K  
 D1 2.00000000 sec  
 D11 0.03000000 sec  
 TD0 1  
 SFO1 100.6550186 MHz  
 NUC1 13C  
 P1 10.00 usec  
 PLW1 56.49300003 W  
 SFO2 400.2596010 MHz  
 NUC2 1H  
 CPDPRG[2] waltz16  
 PCPD2 90.00 usec  
 PLW2 15.21399975 W  
 PLW12 0.42261001 W  
 PLW13 0.21257000 W

F2 - Processing parameters  
 SI 32768  
 SF 100.6449542 MHz  
 WDW EM  
 SSB 0  
 LB 1.00 Hz  
 GB 0  
 PC 1.40

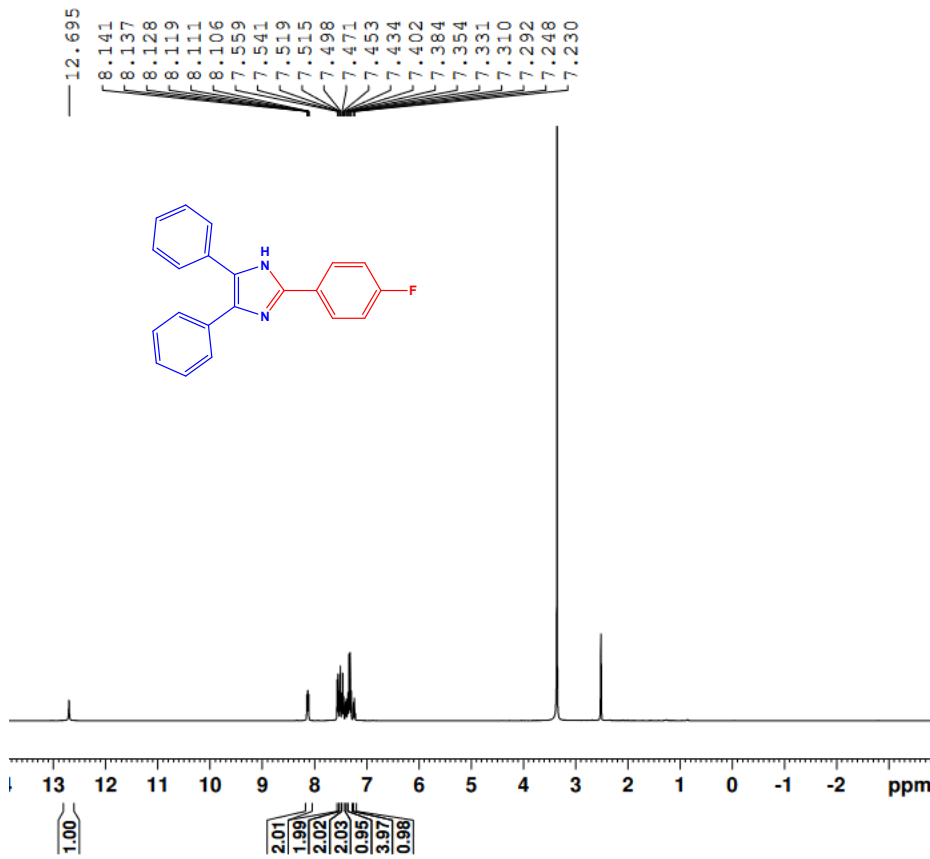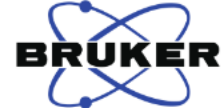

Current Data Parameters  
 NAME Dr.SYNI70524  
 EXPNO 23  
 PROCNO 1

F2 - Acquisition Parameters  
 Date\_ 20240517  
 Time 15.42 h  
 INSTRUM spect  
 PROBHD Z108618\_0505 (  
 PULPROG zg30  
 TD 65536  
 SOLVENT DMSO  
 NS 32  
 DS 2  
 SWH 8012.820 Hz  
 FIDRES 0.244532 Hz  
 AQ 4.0894465 sec  
 RG 143.73  
 DW 62.400 usec  
 DE 6.50 usec  
 TE 304.0 K  
 D1 1.00000000 sec  
 TD0 1  
 SFO1 400.2604716 MHz  
 NUC1 1H  
 P1 15.00 usec  
 PLW1 15.21399975 W

F2 - Processing parameters  
 SI 65536  
 SF 400.2580000 MHz  
 WDW EM  
 SSB 0  
 LB 0.30 Hz  
 GB 0  
 PC 1.00



8.141  
8.137  
8.128  
8.119  
8.111  
8.106

7.559  
7.541  
7.519  
7.515  
7.498  
7.471  
7.433  
7.434  
7.402  
7.384  
7.354  
7.331  
7.310  
7.292  
7.248  
7.230  
7.212

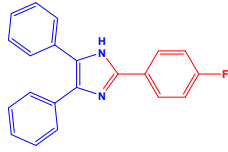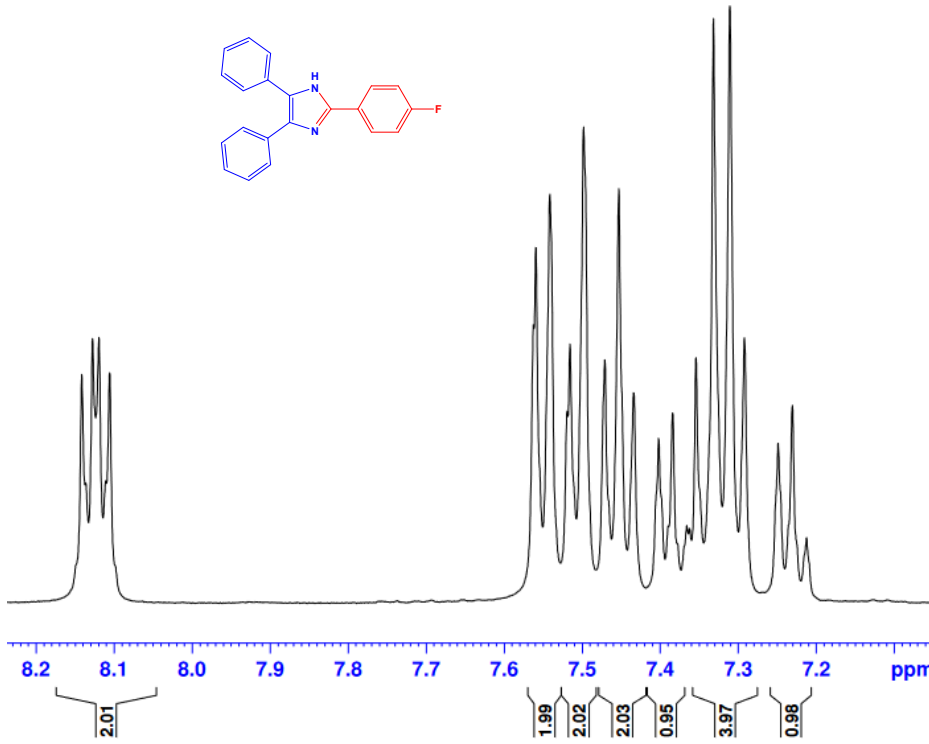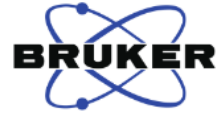

Current Data Parameters  
NAME Dr.SYN170524  
EXPNO 23  
PROCNO 1

F2 - Acquisition Parameters  
Date\_ 20240517  
Time 15.42 h  
INSTRUM spect  
PROBHD Z108618\_0505 (  
PULPROG zg30  
TD 65536  
SOLVENT DMSO  
NS 32  
DS 2  
SWH 8012.820 Hz  
FIDRES 0.244532 Hz  
AQ 4.0894465 sec  
RG 143.73  
DW 62.400 usec  
DE 6.50 usec  
TE 304.0 K  
D1 1.00000000 sec  
TD0 1  
SFO1 400.2604716 MHz  
NUC1 1H  
P1 15.00 usec  
PLW1 15.21399975 W

F2 - Processing parameters  
SI 65536  
SF 400.2580000 MHz  
WDW EM  
SSB 0  
LB 0.30 Hz  
GB 0  
PC 1.00

12.688

7.524  
7.521  
7.503  
7.482  
7.464  
7.441  
7.423  
7.404  
7.376  
7.365  
7.358  
7.316  
7.298  
7.279  
7.240  
7.222  
7.203  
6.861  
6.853  
6.257  
6.255  
6.249

2.380

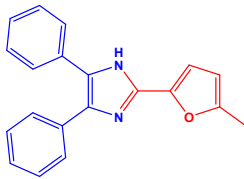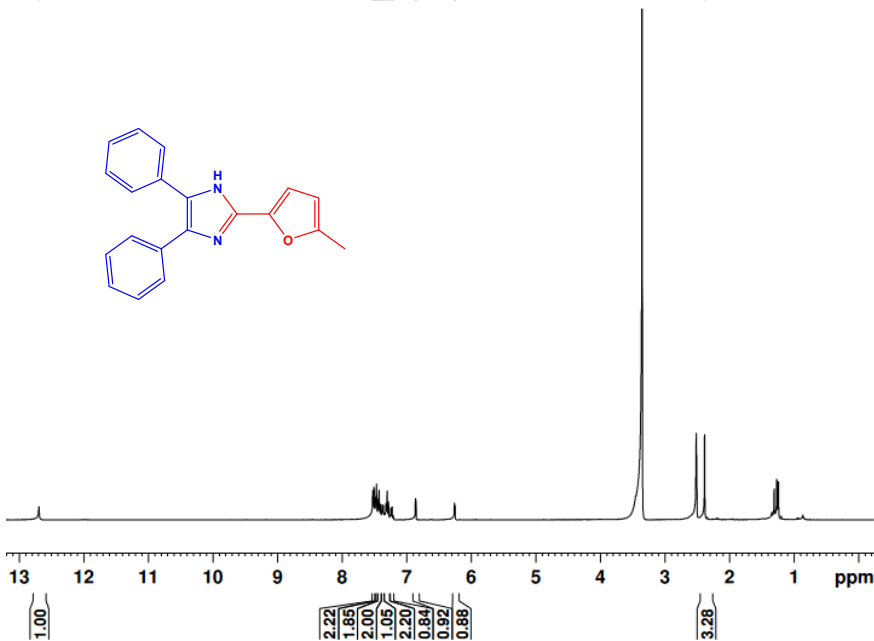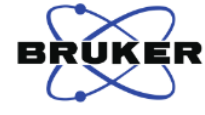

Current Data Parameters  
NAME Dr.SYN210524  
EXPNO 32  
PROCNO 1

F2 - Acquisition Parameters  
Date\_ 20240521  
Time 15.13 h  
INSTRUM spect  
PROBHD Z108618\_0505 (  
PULPROG zg30  
TD 65536  
SOLVENT DMSO  
NS 32  
DS 2  
SWH 8012.820 Hz  
FIDRES 0.244532 Hz  
AQ 4.0894465 sec  
RG 156.91  
DW 62.400 usec  
DE 6.50 usec  
TE 303.5 K  
D1 1.00000000 sec  
TD0 1  
SFO1 400.2604716 MHz  
NUC1 1H  
P1 15.00 usec  
PLW1 15.21399975 W

F2 - Processing parameters  
SI 65536  
SF 400.2580000 MHz  
WDW EM  
SSB 0  
LB 0.30 Hz  
GB 0  
PC 1.00

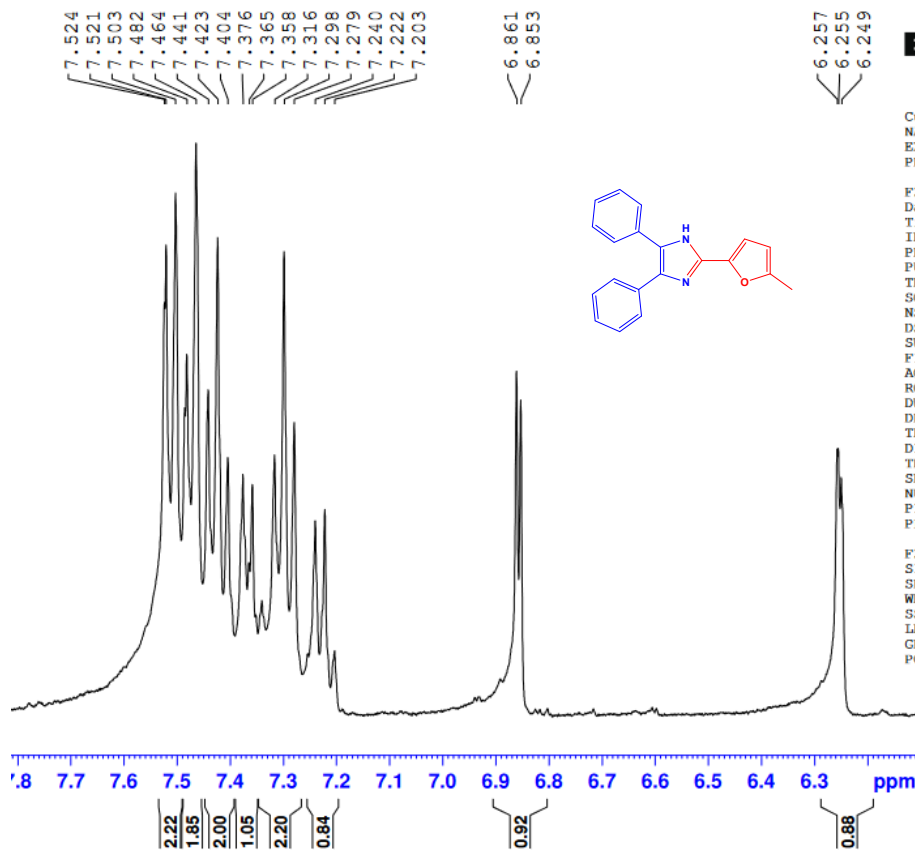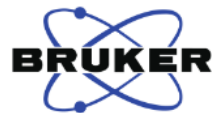

Current Data Parameters  
NAME Dr.SYN210524  
EXPNO 32  
PROCNO 1

F2 - Acquisition Parameters  
Date\_ 20240521  
Time 15.13 h  
INSTRUM spect  
PROBHD Z108618\_0505 (  
PULPROG zg30  
TD 65536  
SOLVENT DMSO  
NS 32  
DS 2  
SWH 8012.820 Hz  
FIDRES 0.244532 Hz  
AQ 4.0894465 sec  
RG 156.91  
DW 62.400 usec  
DE 6.50 usec  
TE 303.5 K  
D1 1.00000000 sec  
TD0 1  
SF01 400.2604716 MHz  
NUC1 1H  
P1 15.00 usec  
PLW1 15.21399975 W

F2 - Processing parameters  
SI 65536  
SF 400.2580000 MHz  
WDW EM  
SSB 0  
LB 0.30 Hz  
GB 0  
PC 1.00

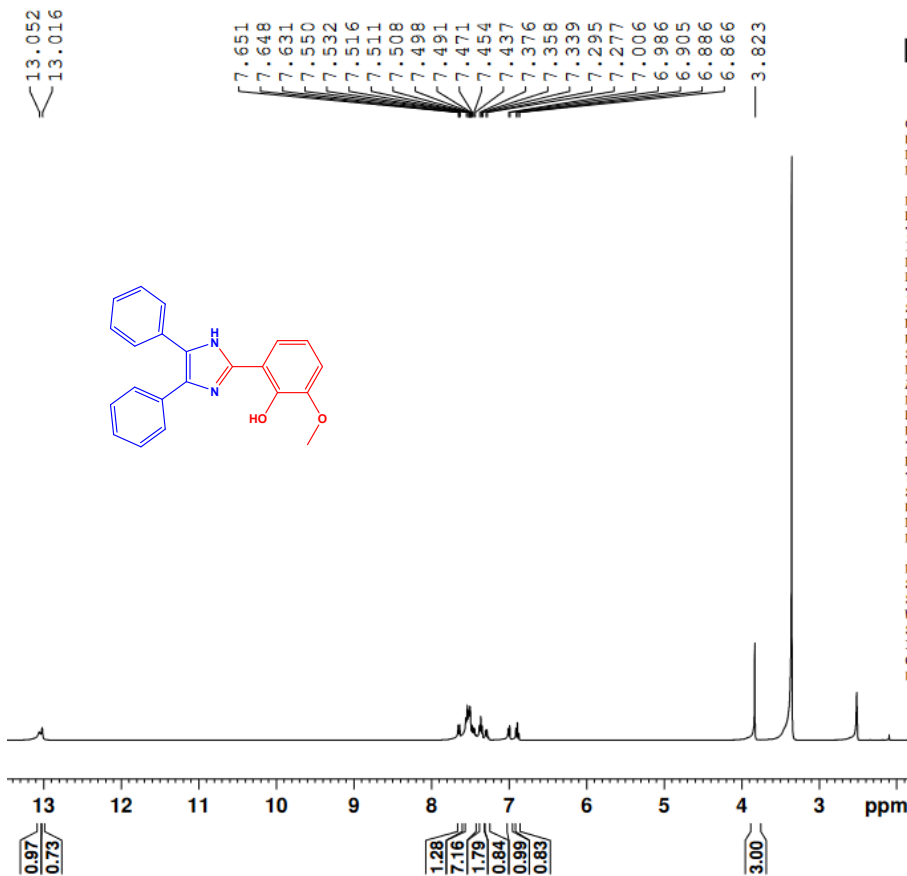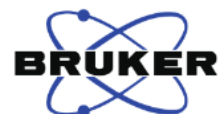

Current Data Parameters  
NAME Dr.SYN230524  
EXPNO 35  
PROCNO 1

F2 - Acquisition Parameters  
Date\_ 20240523  
Time 15.53 h  
INSTRUM spect  
PROBHD Z108618\_0505 (  
PULPROG zg30  
TD 65536  
SOLVENT DMSO  
NS 32  
DS 2  
SWH 8012.820 Hz  
FIDRES 0.244532 Hz  
AQ 4.0894465 sec  
RG 156.91  
DW 62.400 usec  
DE 6.50 usec  
TE 303.4 K  
D1 1.00000000 sec  
TD0 1  
SF01 400.2604716 MHz  
NUC1 1H  
P1 15.00 usec  
PLW1 15.21399975 W

F2 - Processing parameters  
SI 65536  
SF 400.2580000 MHz  
WDW EM  
SSB 0  
LB 0.30 Hz  
GB 0  
PC 1.00

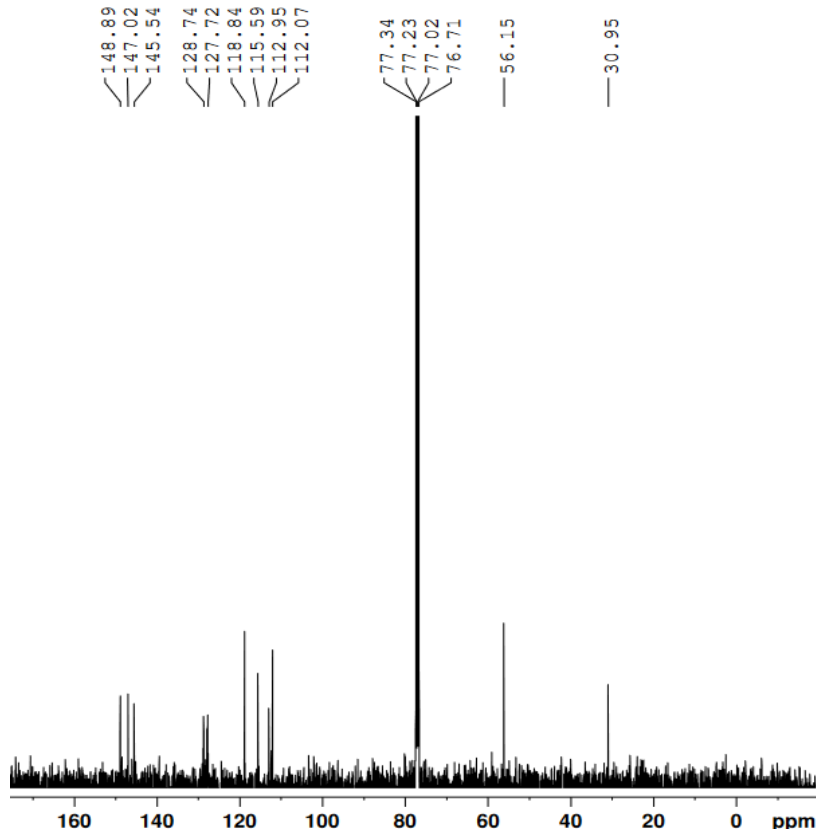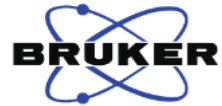

Current Data Parameters  
NAME Dr.SYN280924  
EXPNO 38  
PROCNO 1

F2 - Acquisition Parameters  
Date\_ 20240929  
Time 11.43 h  
INSTRUM spect  
PROBHD Z108618\_0505 ( )  
PULPROG zgpg30  
TD 65536  
SOLVENT CDC13  
NS 512  
DS 4  
SWH 24038.461 Hz  
FIDRES 0.733596 Hz  
AQ 1.3631488 sec  
RG 199.6  
DW 20.800 usec  
DE 6.50 usec  
TE 303.9 K  
D1 2.0000000 sec  
D11 0.0300000 sec  
TD0 1  
SFO1 100.6550186 MHz  
NUC1 13C  
P1 10.00 usec  
PLW1 56.49300003 W  
SFO2 400.2596010 MHz  
NUC2 1H  
CPCPRG[2] waltz16  
PCPD2 90.00 usec  
PLW2 15.21399975 W  
PLW12 0.42261001 W  
PLW13 0.21257000 W

F2 - Processing parameters  
SI 32768  
SF 100.6449542 MHz  
WDW EM  
SSB 0  
LB 1.00 Hz  
GB 0  
PC 1.40

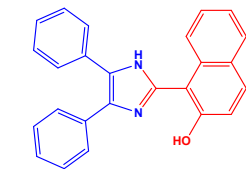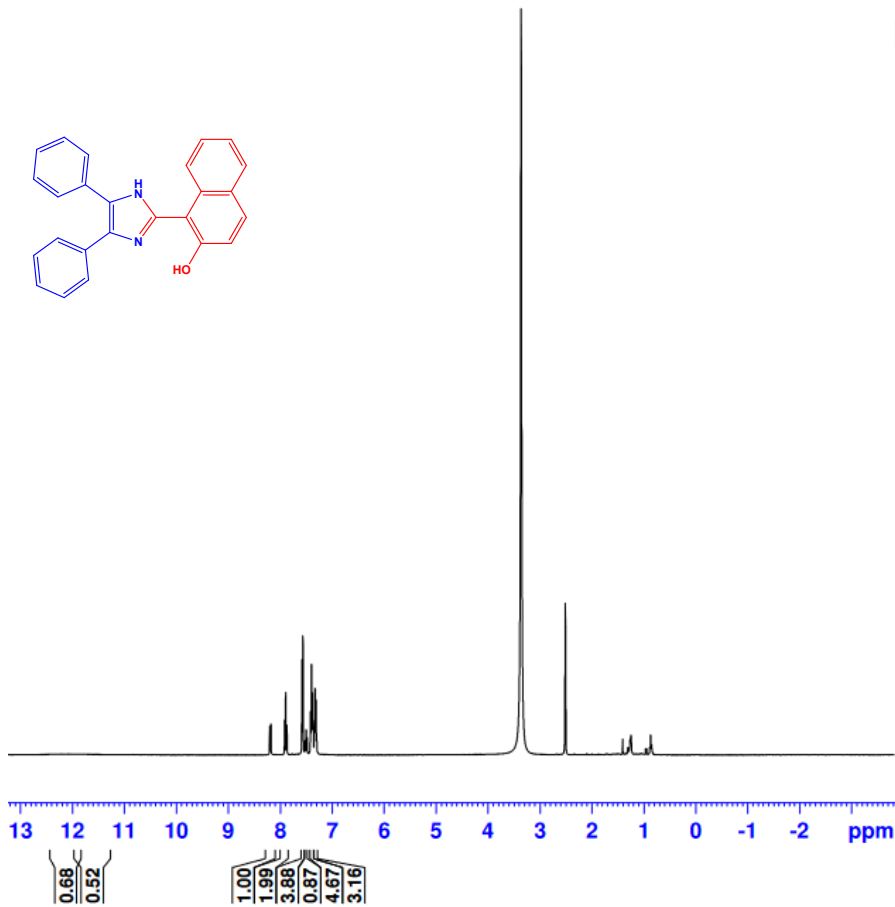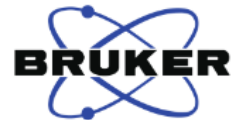

Current Data Parameters  
NAME Dr.SYN170524 2  
EXPNO 24  
PROCNO 1

F2 - Acquisition Parameters  
Date\_ 20240517  
Time 18.48 h  
INSTRUM spect  
PROBHD Z108618\_0505 ( )  
PULPROG zg30  
TD 65536  
SOLVENT DMSO  
NS 32  
DS 2  
SWH 8012.820 Hz  
FIDRES 0.244532 Hz  
AQ 4.0894465 sec  
RG 143.73  
DW 62.400 usec  
DE 6.50 usec  
TE 303.5 K  
D1 1.0000000 sec  
TD0 1  
SFO1 400.2604716 MHz  
NUC1 1H  
P1 15.00 usec  
PLW1 15.21399975 W

F2 - Processing parameters  
SI 65536  
SF 400.2580000 MHz  
WDW EM  
SSB 0  
LB 0.30 Hz  
GB 0  
PC 1.00

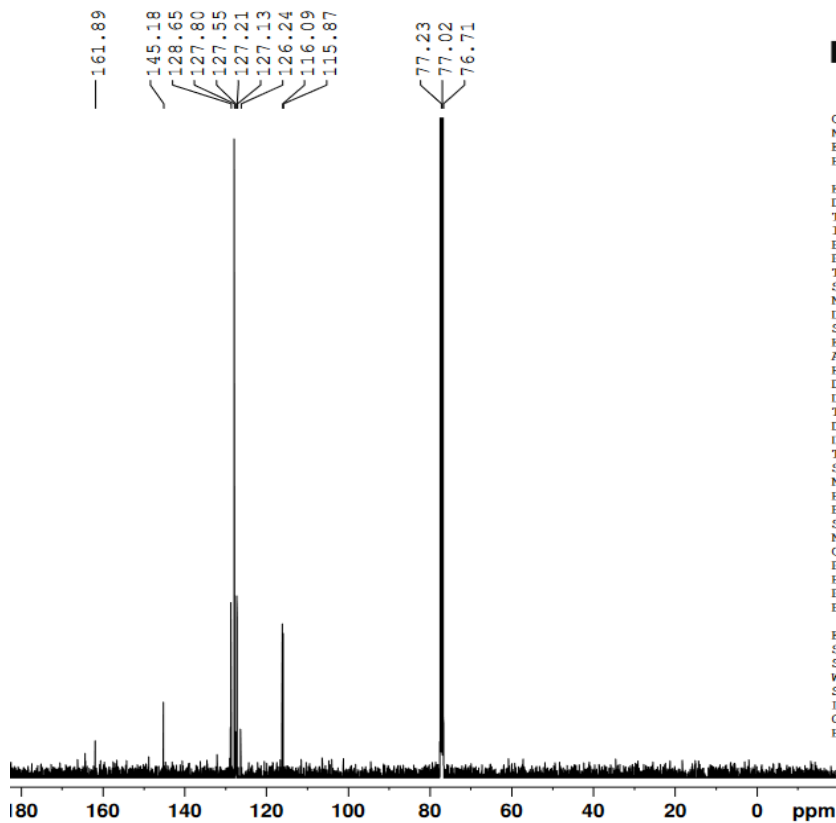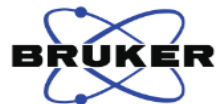

Current Data Parameters  
 NAME 32  
 EXPNO 32  
 PROCNO 1

F2 - Acquisition Parameters  
 Date\_ 20240927  
 Time 20.37 h  
 INSTRUM spect  
 PROBHD z108618\_0505 ( )  
 PULPROG zgpg30  
 TD 65536  
 SOLVENT CDCl3  
 NS 512  
 DS 4  
 SWH 24038.461 Hz  
 FIDRES 0.733596 Hz  
 AQ 1.3631488 sec  
 RG 199.6  
 DW 20.800 usec  
 DE 6.50 usec  
 TE 304.0 K  
 D1 2.0000000 sec  
 D11 0.0300000 sec  
 TD0 1  
 SFO1 100.6550186 MHz  
 NUC1 13C  
 P1 10.00 usec  
 PLW1 56.49300003 W  
 SFO2 400.2596010 MHz  
 NUC2 1H  
 CPDPRG12 waltz16  
 PCPD2 90.00 usec  
 PLW2 15.21399975 W  
 PLW12 0.42261001 W  
 PLW13 0.21257000 W

F2 - Processing parameters  
 SI 32768  
 SF 100.6449542 MHz  
 WDW EM  
 SSB 0  
 LB 1.00 Hz  
 GB 0  
 PC 1.40

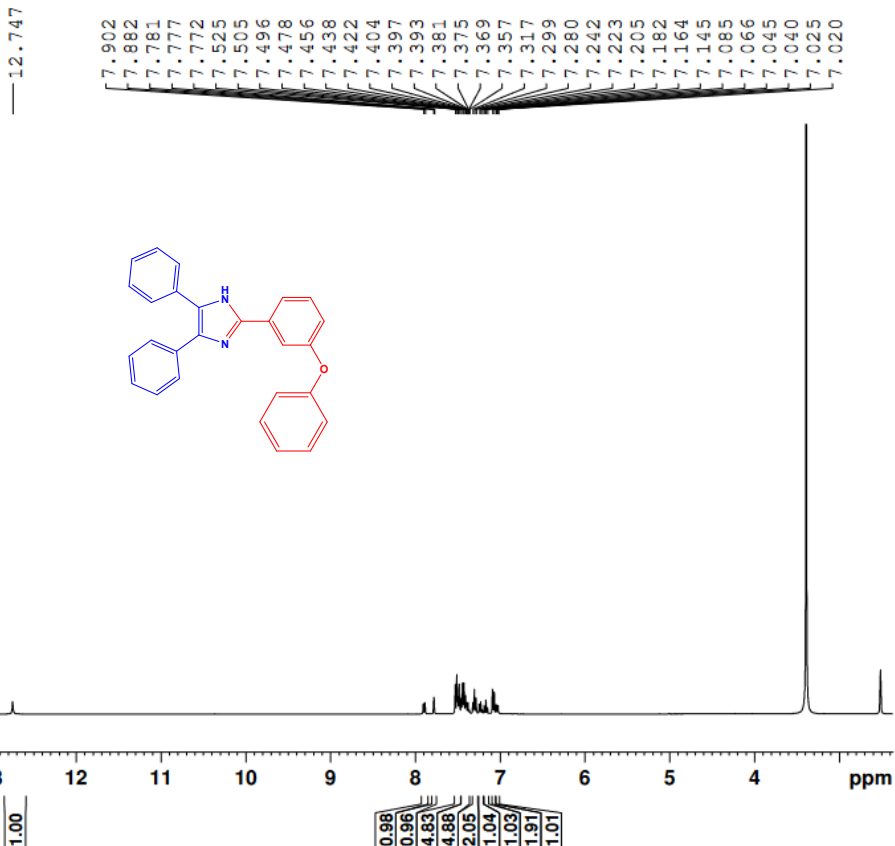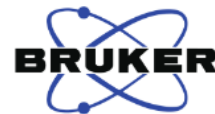

Current Data Parameters  
 NAME Dr.SYN240624  
 EXPNO 36  
 PROCNO 1

F2 - Acquisition Parameters  
 Date\_ 20240624  
 Time 12.07 h  
 INSTRUM spect  
 PROBHD z108618\_0505 ( )  
 PULPROG zg30  
 TD 65536  
 SOLVENT DMSO  
 NS 32  
 DS 2  
 SWH 8012.820 Hz  
 FIDRES 0.244532 Hz  
 AQ 4.0894465 sec  
 RG 98.85  
 DW 62.400 usec  
 DE 6.50 usec  
 TE 303.5 K  
 D1 1.0000000 sec  
 TD0 1  
 SFO1 400.2604716 MHz  
 NUC1 1H  
 P1 15.00 usec  
 PLW1 15.21399975 W

F2 - Processing parameters  
 SI 65536  
 SF 400.2580000 MHz  
 WDW EM  
 SSB 0  
 LB 0.30 Hz  
 GB 0  
 PC 1.00

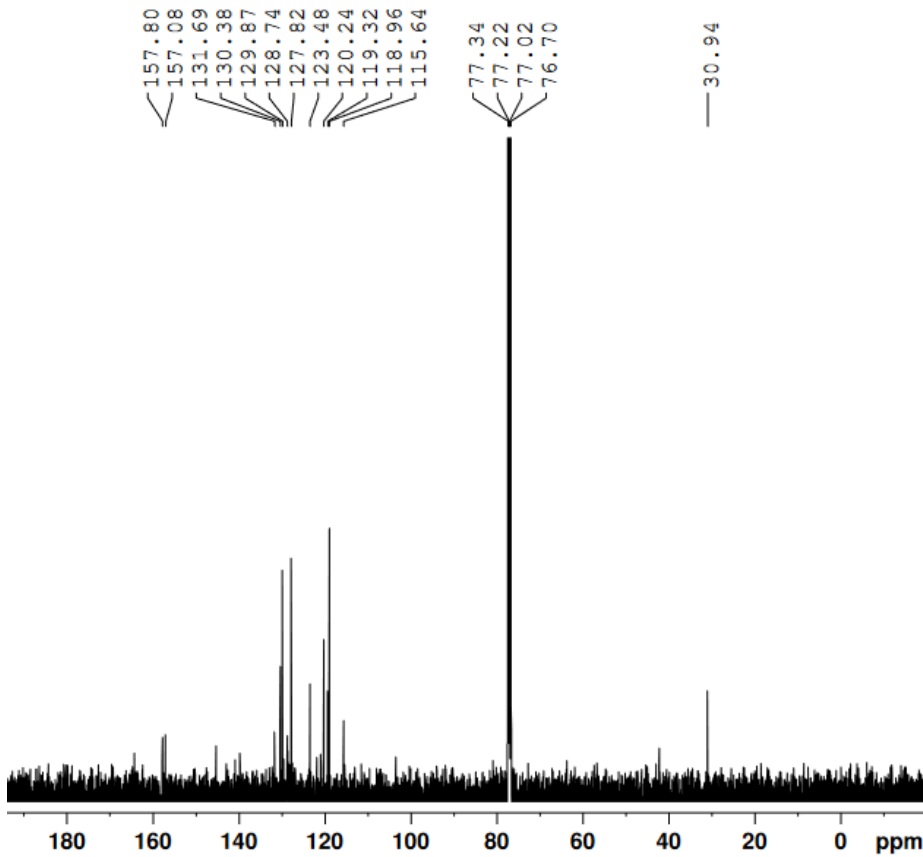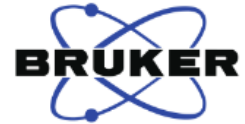

Current Data Parameters  
NAME Dr.SYN191024  
EXPNO 30  
PROCNO 1

F2 - Acquisition Parameters  
Date\_ 20241019  
Time 20.35 h  
INSTRUM spect  
PROBHD z108618\_0505 ( (   
PULPROG zgpg30  
TD 65536  
SOLVENT CDC13  
NS 512  
DS 4  
SWH 24038.461 Hz  
FIDRES 0.733596 Hz  
AQ 1.3631488 sec  
RG 156.91  
DW 20.800 usec  
DE 6.50 usec  
TE 304.6 K  
D1 2.00000000 sec  
D11 0.03000000 sec  
TDO 1  
SFO1 100.6550186 MHz  
NUC1 13C  
P1 10.00 usec  
PLW1 56.49300003 W  
SFO2 400.2596010 MHz  
NUC2 1H  
CPDPRG2 waltz16  
PCPD2 90.00 usec  
PLW2 15.21399975 W  
ELW12 0.42261001 W  
ELW13 0.21257000 W

F2 - Processing parameters  
SI 32768  
SF 100.6449542 MHz  
WDW EM  
SSB 0  
LB 1.00 Hz  
GB 0  
PC 1.40

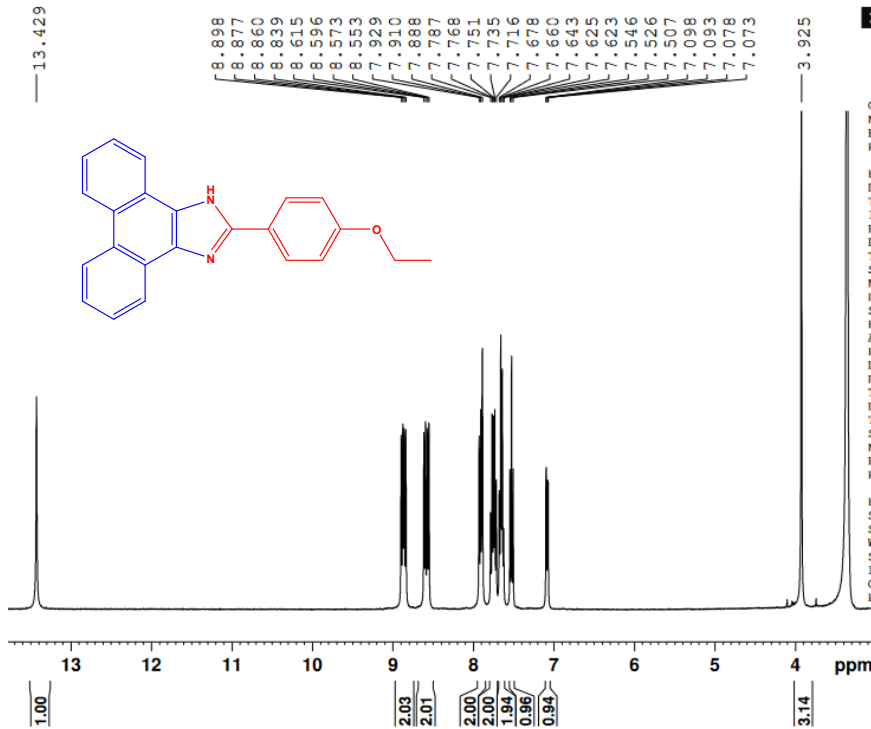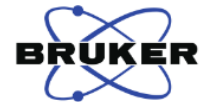

Current Data Parameters  
NAME Dr.SYN270524  
EXPNO 41  
PROCNO 1

F2 - Acquisition Parameters  
Date\_ 20240527  
Time 12.55 h  
INSTRUM spect  
PROBHD z108618\_0505 ( (   
PULPROG zg30  
TD 65536  
SOLVENT DMSO  
NS 32  
DS 2  
SWH 8012.820 Hz  
FIDRES 0.244532 Hz  
AQ 4.0894465 sec  
RG 143.73  
DW 62.400 usec  
DE 6.50 usec  
TE 304.0 K  
D1 1.00000000 sec  
TDO 1  
SFO1 400.2604716 MHz  
NUC1 1H  
P1 15.00 usec  
PLW1 15.21399975 W

F2 - Processing parameters  
SI 65536  
SF 400.2580000 MHz  
WDW EM  
SSB 0  
LB 0.30 Hz  
GB 0  
PC 1.00

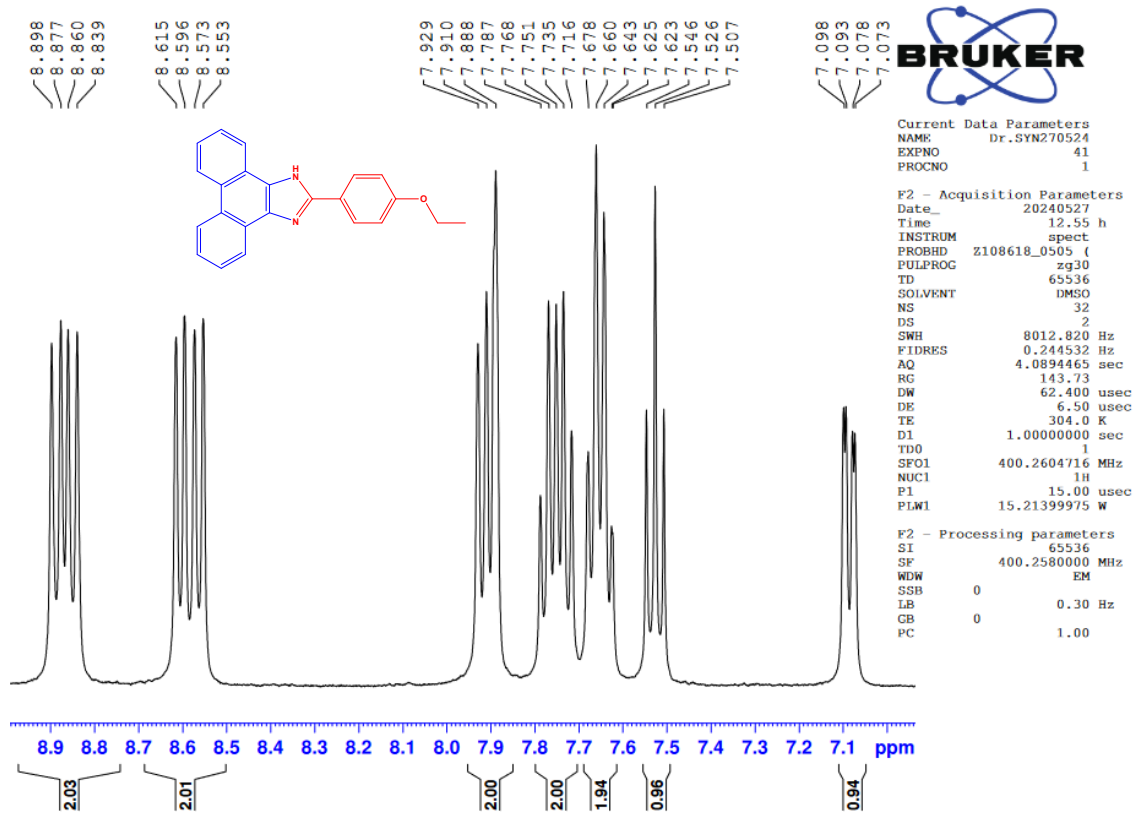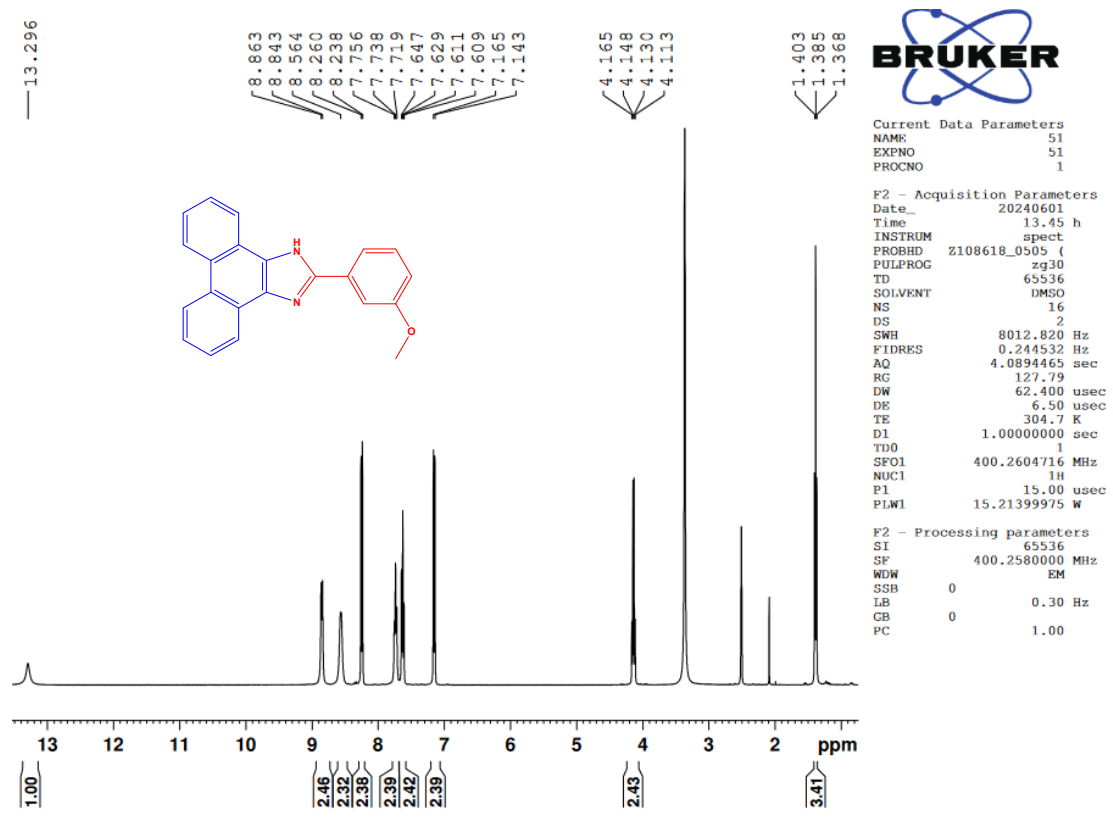

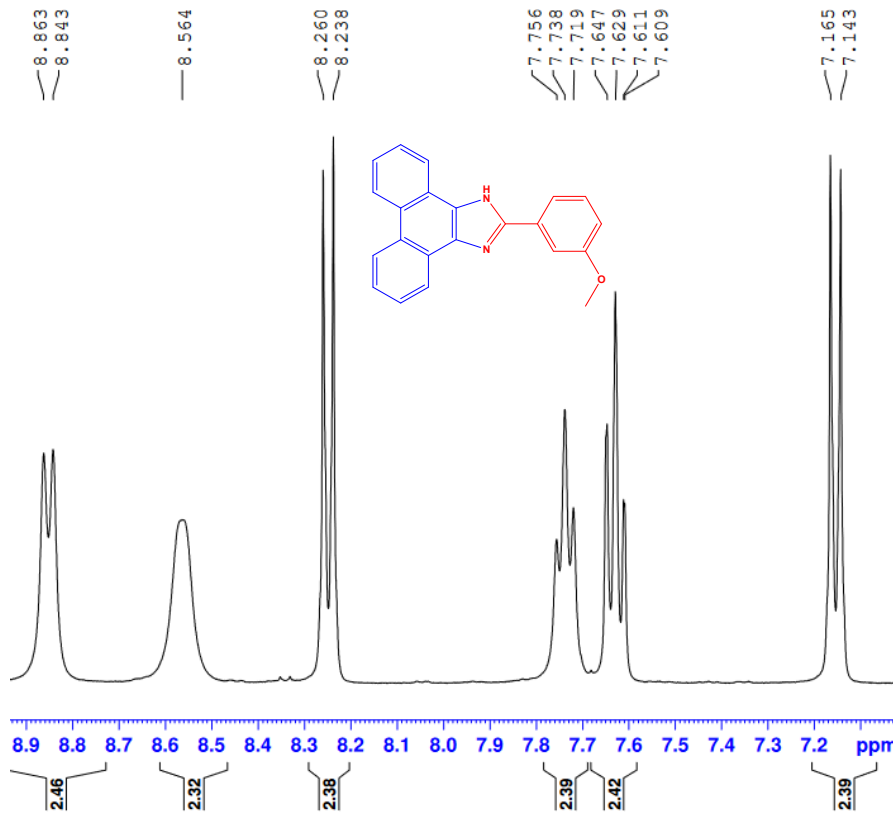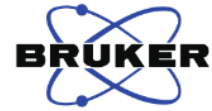

Current Data Parameters  
 NAME: 51  
 EXPNO: 51  
 PROCNO: 1

F2 - Acquisition Parameters  
 Date\_: 20240601  
 Time: 13.45 h  
 INSTRUM: spect  
 PROBHD: Z108618\_0505 ( )  
 PULPROG: zg30  
 TD: 65536  
 SOLVENT: DMSO  
 NS: 16  
 DS: 2  
 SWH: 8012.820 Hz  
 FIDRES: 0.244532 Hz  
 AQ: 4.0894465 sec  
 RG: 127.79  
 DW: 62.400 usec  
 DE: 6.50 usec  
 TE: 304.7 K  
 D1: 1.00000000 sec  
 TD0: 1  
 SFO1: 400.2604716 MHz  
 NUC1: 1H  
 P1: 15.00 usec  
 PLW1: 15.21399975 W

F2 - Processing parameters  
 SI: 65536  
 SF: 400.2580000 MHz  
 WDW: EM  
 SSB: 0  
 LB: 0.30 Hz  
 GB: 0  
 PC: 1.00

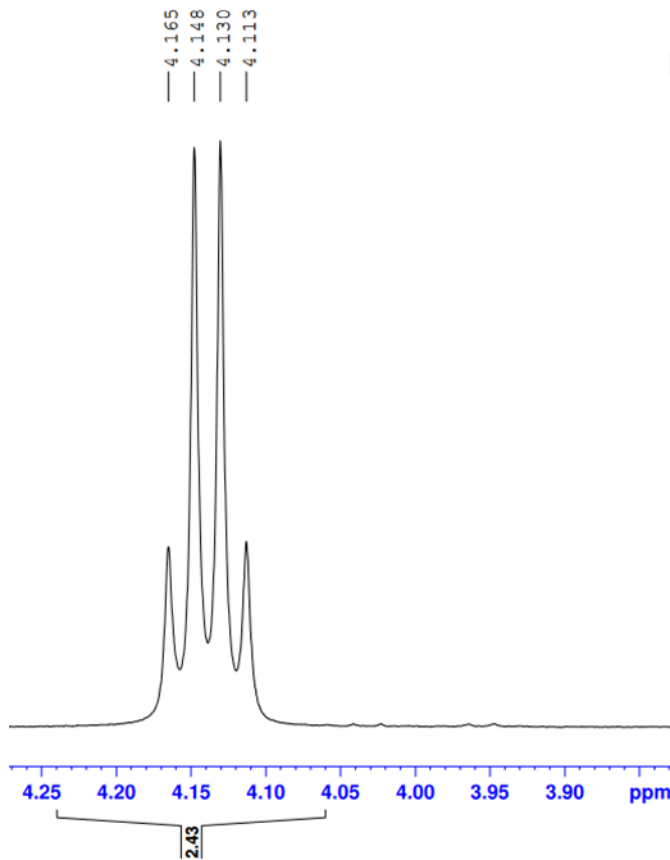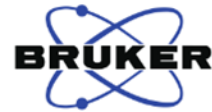

Current Data Parameters  
 NAME: 51  
 EXPNO: 51  
 PROCNO: 1

F2 - Acquisition Parameters  
 Date\_: 20240601  
 Time: 13.45 h  
 INSTRUM: spect  
 PROBHD: Z108618\_0505 ( )  
 PULPROG: zg30  
 TD: 65536  
 SOLVENT: DMSO  
 NS: 16  
 DS: 2  
 SWH: 8012.820 Hz  
 FIDRES: 0.244532 Hz  
 AQ: 4.0894465 sec  
 RG: 127.79  
 DW: 62.400 usec  
 DE: 6.50 usec  
 TE: 304.7 K  
 D1: 1.00000000 sec  
 TD0: 1  
 SFO1: 400.2604716 MHz  
 NUC1: 1H  
 P1: 15.00 usec  
 PLW1: 15.21399975 W

F2 - Processing parameters  
 SI: 65536  
 SF: 400.2580000 MHz  
 WDW: EM  
 SSB: 0  
 LB: 0.30 Hz  
 GB: 0  
 PC: 1.00

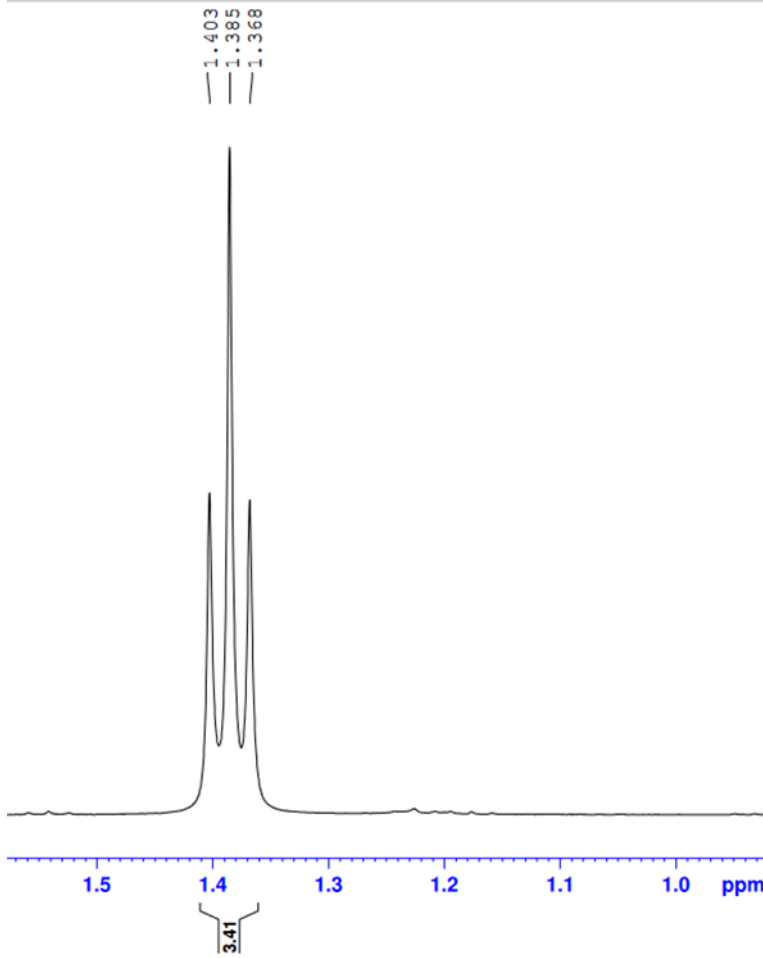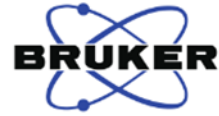

Current Data Parameters  
 NAME 51  
 EXPNO 51  
 PROCNO 1

F2 - Acquisition Parameters  
 Date\_ 20240601  
 Time 13.45 h  
 INSTRUM spect  
 PROBHD z108618\_0505 ( )  
 PULPROG zg30  
 TD 65536  
 SOLVENT DMSO  
 NS 16  
 DS 2  
 SWH 8012.820 Hz  
 FIDRES 0.244532 Hz  
 AQ 4.0894465 sec  
 RG 127.79  
 DW 62.400 usec  
 DE 6.50 usec  
 TE 304.7 K  
 D1 1.00000000 sec  
 TD0 1  
 SFO1 400.2604716 MHz  
 NUC1 1H  
 P1 15.00 usec  
 PLW1 15.21399975 W

F2 - Processing parameters  
 SI 65536  
 SF 400.2580000 MHz  
 WDW EM  
 SSB 0  
 LB 0.30 Hz  
 GB 0  
 PC 1.00

— 13.664

9.205  
 9.184  
 8.905  
 8.888  
 8.655  
 8.591  
 8.159  
 8.141  
 8.120  
 8.094  
 8.075  
 7.782  
 7.774  
 7.764  
 7.756  
 7.746  
 7.736  
 7.707  
 7.704  
 7.687  
 7.649  
 7.632

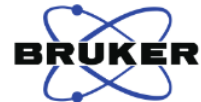

Current Data Parameters  
 NAME 51  
 EXPNO 52  
 PROCNO 1

F2 - Acquisition Parameters  
 Date\_ 20240601  
 Time 13.48 h  
 INSTRUM spect  
 PROBHD z108618\_0505 ( )  
 PULPROG zg30  
 TD 65536  
 SOLVENT DMSO  
 NS 16  
 DS 2  
 SWH 8012.820 Hz  
 FIDRES 0.244532 Hz  
 AQ 4.0894465 sec  
 RG 127.79  
 DW 62.400 usec  
 DE 6.50 usec  
 TE 304.6 K  
 D1 1.00000000 sec  
 TD0 1  
 SFO1 400.2604716 MHz  
 NUC1 1H  
 P1 15.00 usec  
 PLW1 15.21399975 W

F2 - Processing parameters  
 SI 65536  
 SF 400.2580000 MHz  
 WDW EM  
 SSB 0  
 LB 0.30 Hz  
 GB 0  
 PC 1.00

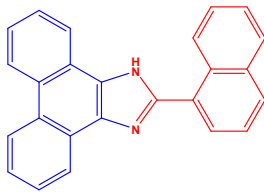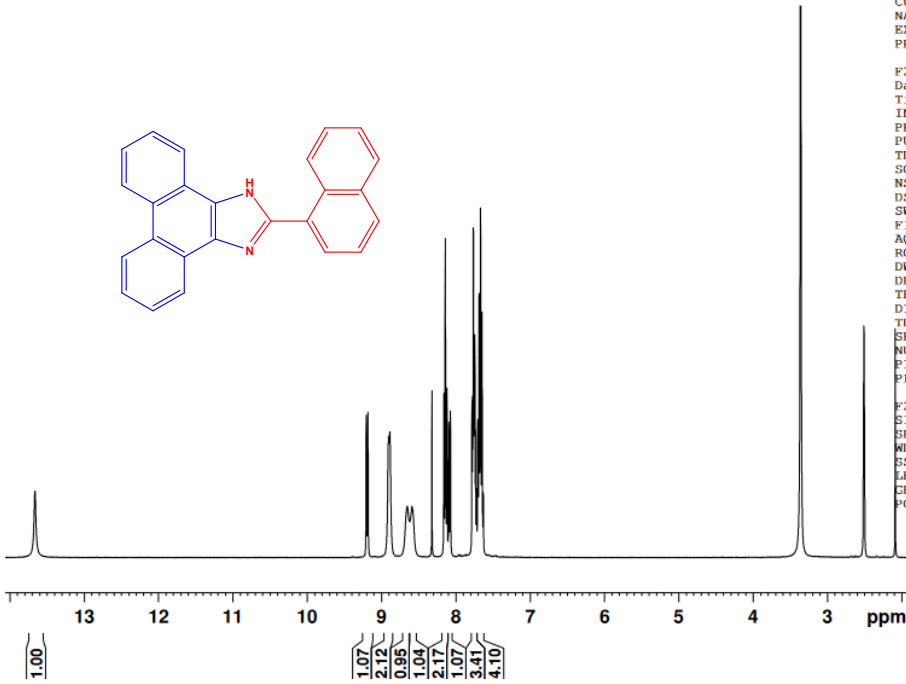



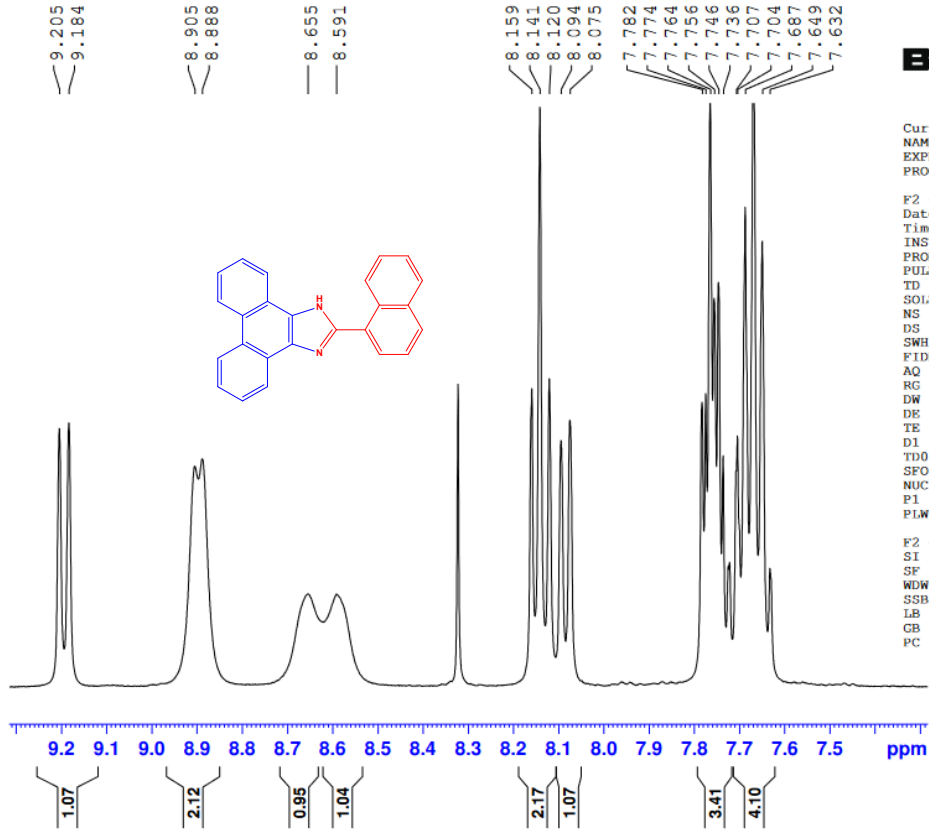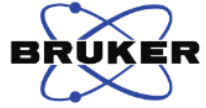

Current Data Parameters  
 NAME 51  
 EXPNO 52  
 PROCNO 1

F2 - Acquisition Parameters  
 Date\_ 20240601  
 Time 13.48 h  
 INSTRUM spect  
 PROBHD z108618\_0505 (  
 PULPROG zg30  
 TD 65536  
 SOLVENT DMSO  
 NS 16  
 DS 2  
 SWH 8012.820 Hz  
 FIDRES 0.244532 Hz  
 AQ 4.0894465 sec  
 RG 127.79  
 DW 62.400 usec  
 DE 6.50 usec  
 TE 304.6 K  
 D1 1.00000000 sec  
 TD0 1  
 SFO1 400.2604716 MHz  
 NUC1 1H  
 F1 15.00 usec  
 PLW1 15.21399975 W

F2 - Processing parameters  
 SI 65536  
 SF 400.2580000 MHz  
 WDW EM  
 SSB 0  
 LB 0.30 Hz  
 GB 0  
 PC 1.00

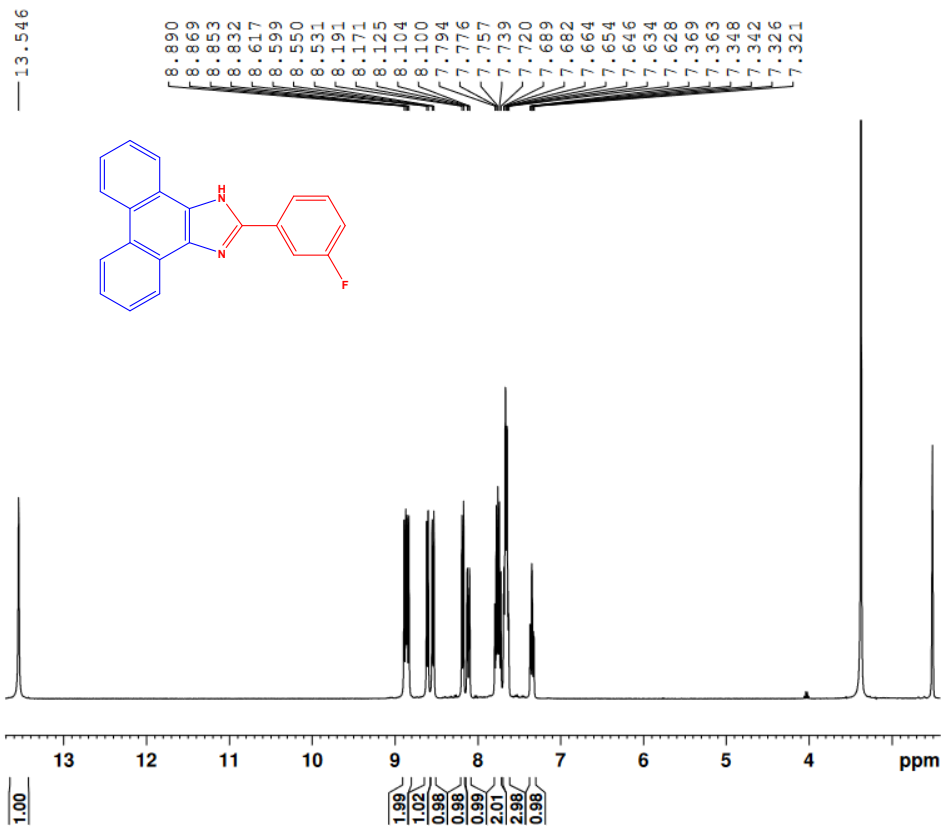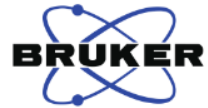

Current Data Parameters  
 NAME Dr.SYN300524  
 EXPNO 48  
 PROCNO 1

F2 - Acquisition Parameters  
 Date\_ 20240530  
 Time 16.47 h  
 INSTRUM spect  
 PROBHD z108618\_0505 (  
 PULPROG zg30  
 TD 65536  
 SOLVENT DMSO  
 NS 32  
 DS 2  
 SWH 8012.820 Hz  
 FIDRES 0.244532 Hz  
 AQ 4.0894465 sec  
 RG 112.69  
 DW 62.400 usec  
 DE 6.50 usec  
 TE 304.7 K  
 D1 1.00000000 sec  
 TD0 1  
 SFO1 400.2604716 MHz  
 NUC1 1H  
 F1 15.00 usec  
 PLW1 15.21399975 W

F2 - Processing parameters  
 SI 65536  
 SF 400.2580000 MHz  
 WDW EM  
 SSB 0  
 LB 0.30 Hz  
 GB 0  
 PC 1.00

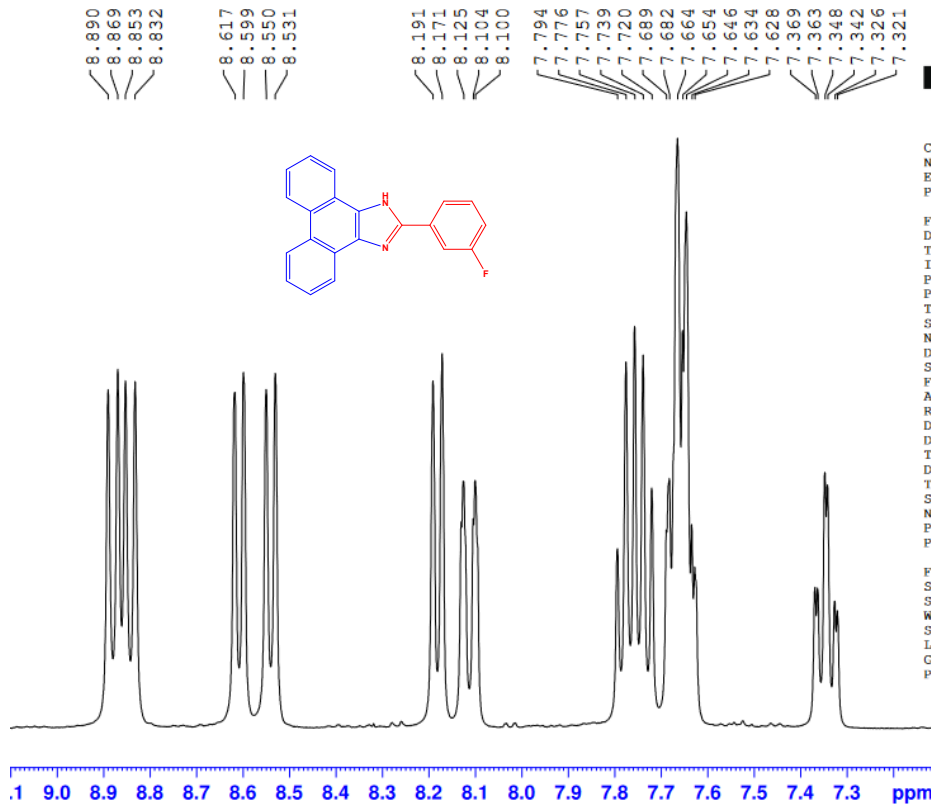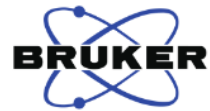

Current Data Parameters  
 NAME Dr.SYN300524  
 EXPNO 48  
 PROCNO 1

F2 - Acquisition Parameters  
 Date\_ 20240530  
 Time 16.47 h  
 INSTRUM spect  
 PROBHD Z108618\_0505 ( )  
 PULPROG zg30  
 TD 65536  
 SOLVENT DMSO  
 NS 32  
 DS 2  
 SWH 8012.820 Hz  
 FIDRES 0.244532 Hz  
 AQ 4.0894465 sec  
 RG 112.69  
 DW 62.400 usec  
 DE 6.50 usec  
 TE 304.7 K  
 D1 1.00000000 sec  
 TD0 1  
 SFO1 400.2604716 MHz  
 NUC1 1H  
 P1 15.00 usec  
 PLW1 15.21399975 W

F2 - Processing parameters  
 SI 65536  
 SF 400.2580000 MHz  
 WDW EM  
 SSB 0  
 LB 0.30 Hz  
 GB 0  
 PC 1.00

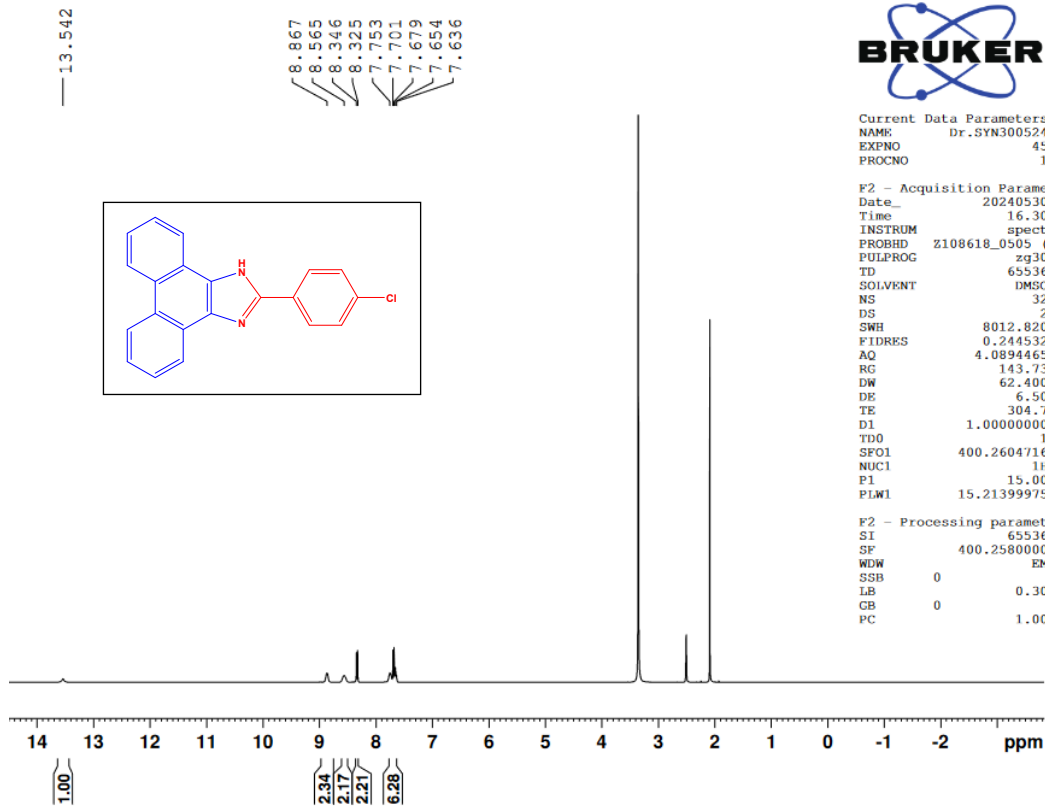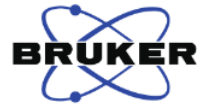

Current Data Parameters  
 NAME Dr.SYN300524  
 EXPNO 45  
 PROCNO 1

F2 - Acquisition Parameters  
 Date\_ 20240530  
 Time 16.30 h  
 INSTRUM spect  
 PROBHD Z108618\_0505 ( )  
 PULPROG zg30  
 TD 65536  
 SOLVENT DMSO  
 NS 32  
 DS 2  
 SWH 8012.820 Hz  
 FIDRES 0.244532 Hz  
 AQ 4.0894465 sec  
 RG 143.73  
 DW 62.400 usec  
 DE 6.50 usec  
 TE 304.7 K  
 D1 1.00000000 sec  
 TD0 1  
 SFO1 400.2604716 MHz  
 NUC1 1H  
 P1 15.00 usec  
 PLW1 15.21399975 W

F2 - Processing parameters  
 SI 65536  
 SF 400.2580000 MHz  
 WDW EM  
 SSB 0  
 LB 0.30 Hz  
 GB 0  
 PC 1.00

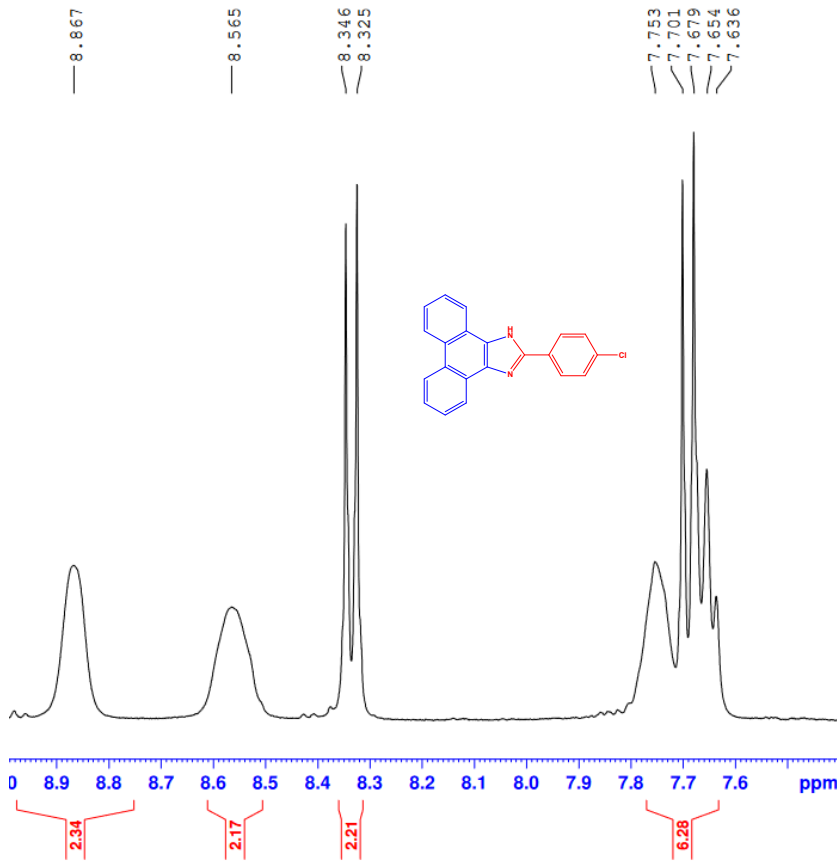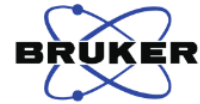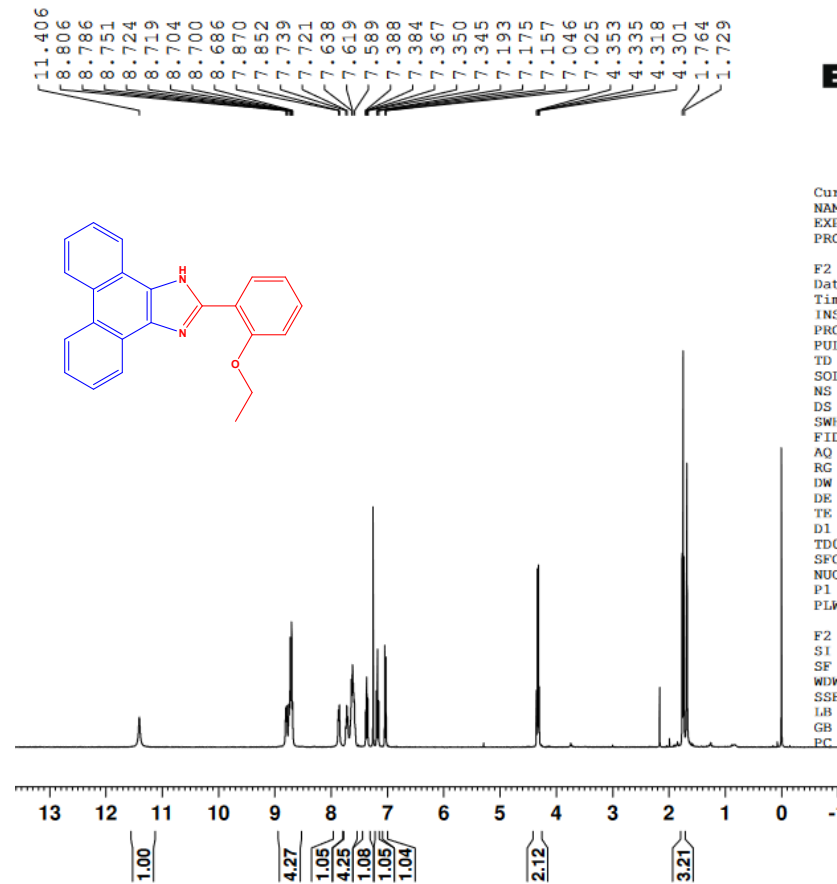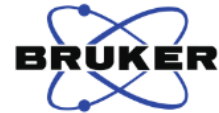

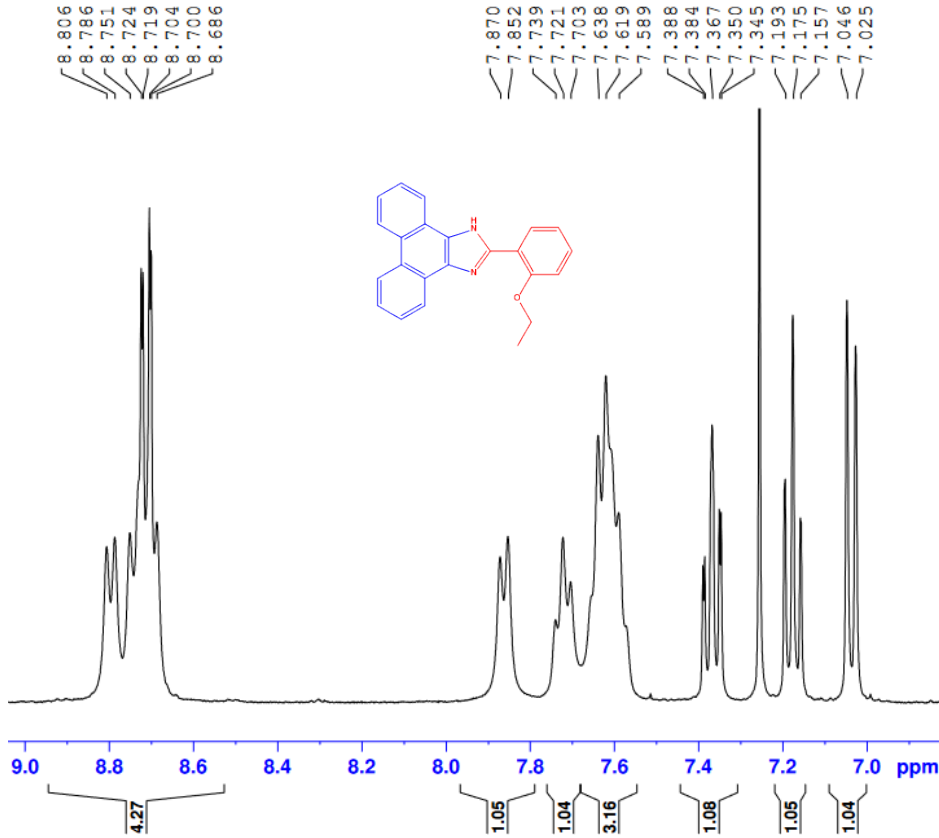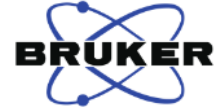

Current Data Parameters  
 NAME Dr.SYN260624  
 EXPNO 37  
 PROCNO 1

F2 - Acquisition Parameters  
 Date\_ 20240626  
 Time 13.27 h  
 INSTRUM spect  
 PROBHD Z108618\_0505 ( )  
 PULPROG zg30  
 TD 65536  
 SOLVENT CDC13  
 NS 16  
 DS 2  
 SWH 8012.820 Hz  
 FIDRES 0.244532 Hz  
 AQ 4.0894465 sec  
 RG 156.91  
 DW 62.400 usec  
 DE 6.50 usec  
 TE 303.4 K  
 D1 1.00000000 sec  
 TD0 1  
 SFO1 400.2604716 MHz  
 NUC1 1H  
 P1 15.00 usec  
 PLW1 15.21399975 W

F2 - Processing parameters  
 SI 65536  
 SF 400.2580119 MHz  
 WDW EM  
 SSB 0  
 LB 0.30 Hz  
 GB 0  
 PC 1.00

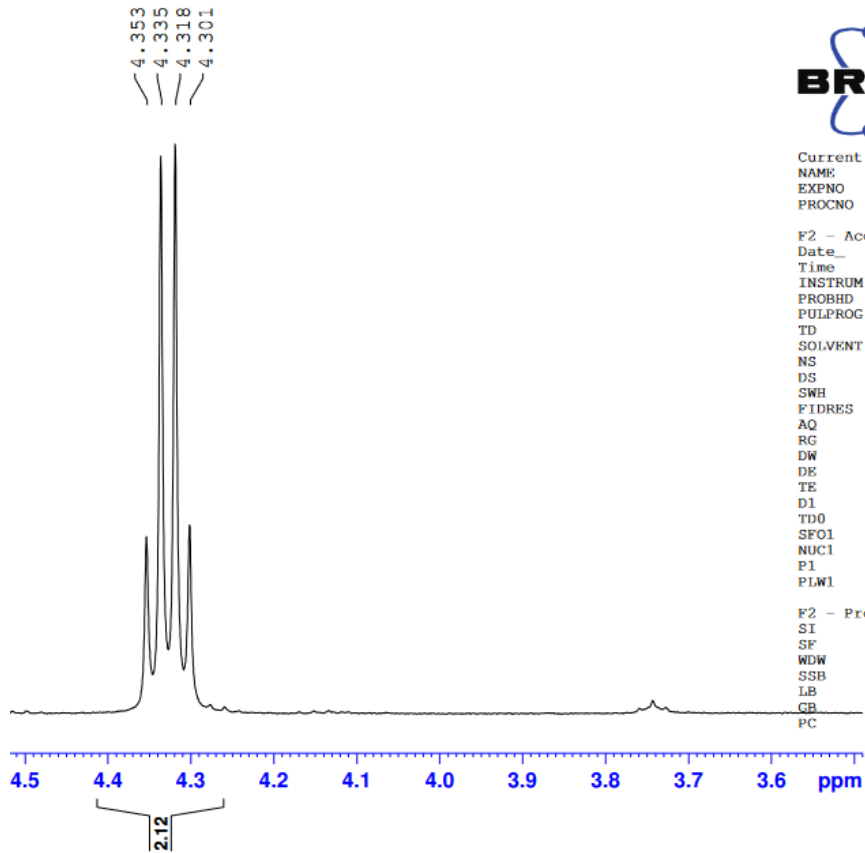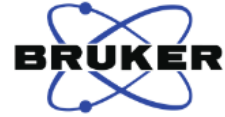

Current Data Parameters  
 NAME Dr.SYN260624  
 EXPNO 37  
 PROCNO 1

F2 - Acquisition Parameters  
 Date\_ 20240626  
 Time 13.27 h  
 INSTRUM spect  
 PROBHD Z108618\_0505 ( )  
 PULPROG zg30  
 TD 65536  
 SOLVENT CDC13  
 NS 16  
 DS 2  
 SWH 8012.820 Hz  
 FIDRES 0.244532 Hz  
 AQ 4.0894465 sec  
 RG 156.91  
 DW 62.400 usec  
 DE 6.50 usec  
 TE 303.4 K  
 D1 1.00000000 sec  
 TD0 1  
 SFO1 400.2604716 MHz  
 NUC1 1H  
 P1 15.00 usec  
 PLW1 15.21399975 W

F2 - Processing parameters  
 SI 65536  
 SF 400.2580119 MHz  
 WDW EM  
 SSB 0  
 LB 0.30 Hz  
 GB 0  
 PC 1.00

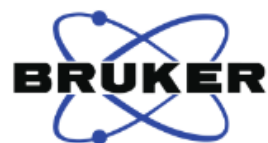

Current Data Parameters  
NAME: Dr.SYN260624  
EXPNO 37  
PROCNO 1

F2 - Acquisition Parameters  
Date\_ 20240626  
Time 13.27 h  
INSTRUM spect  
PROBHD Z108618\_0505 (   
PULPROG zg30  
TD 65536  
SOLVENT CDCl3  
NS 16  
DS 2  
SWH 8012.820 Hz  
FIDRES 0.244532 Hz  
AQ 4.0894465 sec  
RG 156.91  
DW 62.400 usec  
DE 6.50 usec  
TE 303.4 K  
D1 1.00000000 sec  
TD0 1  
SFO1 400.2604716 MHz  
NUC1 1H  
P1 15.00 usec  
PLW1 15.21399975 W

F2 - Processing parameters  
SI 65536  
SF 400.2580119 MHz  
WDW EM  
SSB 0  
LB 0.30 Hz  
GB 0  
PC 1.00

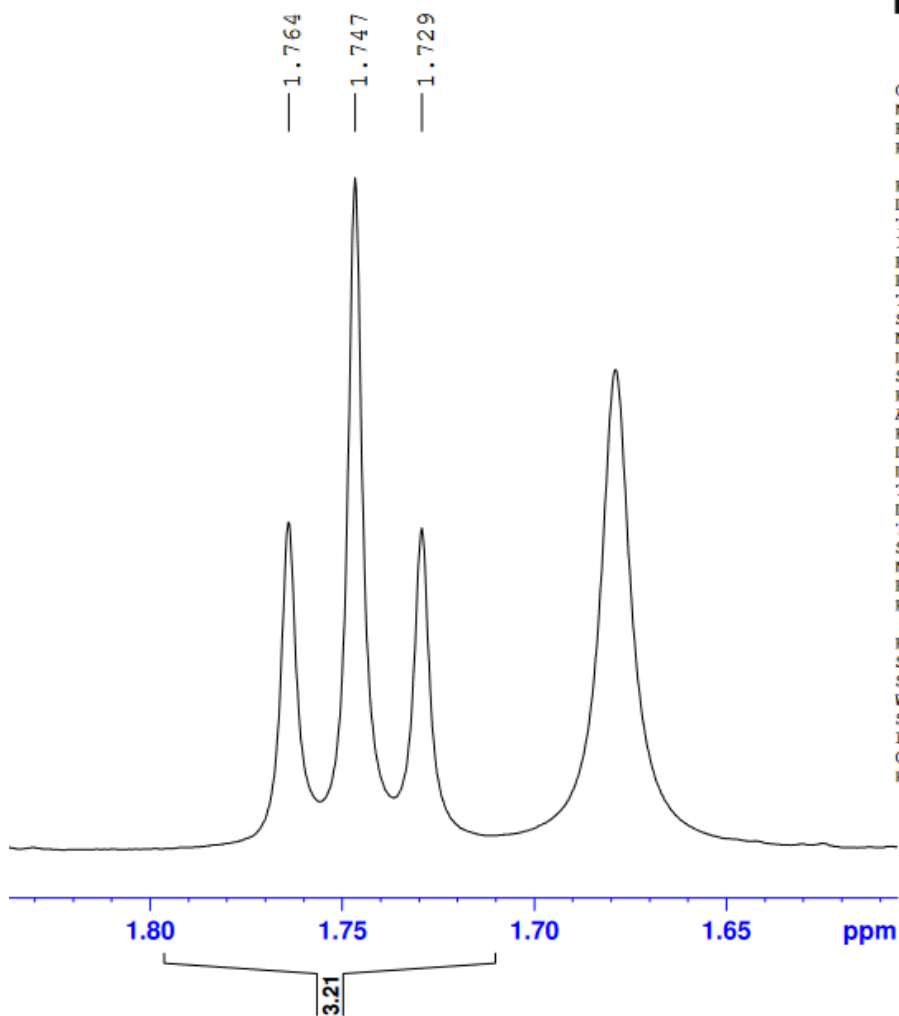

Supplement: d4ra06474g1.pdf [file d4ra06474g1.pdf]
